# Supplementary material for: Novel Extracellular Exosome Promoting Tumor Aggressiveness and Metastasis in Gynecologic Cancer
Source: Preprints.org preprint supplement (doi:10.20944/preprints202409.2374.v1), 2024-09-30
Supplement: Supplementary file 1 [file supplementary]

## Sheet: Sheet1
gene_names	PFIˍexp(coef)	PFI_Pr(>|z|)_pvalue	PFI_related	G1_log2(ES2+ES2EXO vs ES2)	G2_log2(ES2+ES2TSEXO vs ES2)	G3_log2(OCSPC+ES2EXO vs OCSPC)	G4_log2(ES2+ES2TSEXO vs ES2+ES2EXO)	G5_log2(OCSPC+ES2EXO vs ES2+ES2EXO)	total_nonNA#	G1>0	G2>0	G3>0	G4>0	G5>0	total# >0	AVG_exp	|G1|>1	|G2|>1	|G3|>1	|G4|>1	|G5|>1	DEG#
SERPINE1	1.00068	0.0155519	1	3.3397	3.17088	3.91042	0.686896	-1.46777	5	1	1	1	1	0	4	1.92803	1	1	1	0	1	4
TGFBI	1.00248	0.00832146	1	6.57419	4.16907	0.785472	0.688404	1.88162	5	1	1	1	1	1	5	2.81975	1	1	0	0	1	3
CCDC80	1.00498	0.0120785	1	2.22801	1.77149	-1.96822	0.741	-0.394694	5	1	1	0	1	0	3	0.475517	1	1	1	0	0	3
LGALS1	1.00026	0.0252667	1	2.50271	1.47149	0.134101	-0.323809	-1.85208	5	1	1	1	0	0	3	0.386483	1	1	0	0	1	3
HIST2H3PS2	3.70933	0.0044078	1	-4.96185	-5.16032	-1.00478	0.472473	0.450273	5	0	0	0	1	1	2	-2.04084	1	1	1	0	0	3
CTGF	1.00044	0.0131679	1	-1.70738	-1.34618	-0.545222	0.833358	-2.59475	5	0	0	0	1	0	1	-1.07204	1	1	0	0	1	3
NCL	0.998206	0.0324849	1	1.60463	0.95804	0.696414	-0.271969	-3.06307	5	1	1	1	0	0	3	-0.015191	1	0	0	0	1	2
HSPG2	1.00302	0.0277165	1	1.56498	-0.614155	-0.466875	-1.24577	0.2425	5	1	0	0	0	1	2	-0.103865	1	0	0	1	0	2
PSMB1	1.00308	0.00141637	1	-1.20355	-2.0518	-0.0626726	0.417654	0.118212	5	0	0	0	1	1	2	-0.556433	1	1	0	0	0	2
PLAU	1.00163	0.0362703	1	-1.47971	-2.92547	-0.456984	-0.504073	-0.993237	5	0	0	0	0	0	0	-1.27189	1	1	0	0	0	2
CYR61	1.0006	0.0387205	1	-1.62541	-2.62083	#N/A	0.209538	-3.68044	4	0	0		1	0	1	-1.92929	1	1		0	1	3
TFRC	1.00212	0.0377927	1	-3.4017	-3.41765	-0.744355	#N/A	0.472488	4	0	0	0		1	1	-1.7728	1	1	0		0	2
GNB4	1.01858	0.0378786	1	-1.2869	-1.87465	-0.133426	#N/A	#N/A	3	0	0	0			0	-1.09833	1	1	0			2
FST	1.00466	0.00551306	1	-1.85216	-2.32615	#N/A	-0.00351005	#N/A	3	0	0		0		0	-1.39394	1	1		0		2
UBE2NL	3.00714	0.049492	1	2.19861	0.609618	#N/A	-0.0948896	#N/A	3	1	1		0		2	0.904445	1	0		0		1
ARPC4	1.00695	0.00311609	1	1.57189	0.271724	#N/A	#N/A	-0.881135	3	1	1			0	2	0.320825	1	0			0	1
LIF	1.00683	0.0357332	1	-1.59415	-1.55973	#N/A	#N/A	#N/A	2	0	0				0	-1.57694	1	1				2
ERP29	0.996944	0.0393226	1	-1.67701	-2.43892	#N/A	#N/A	#N/A	2	0	0				0	-2.05796	1	1				2
SLC25A31	61.3742	0.00382613	1	-3.60451	#N/A	-1.90958	#N/A	#N/A	2	0		0			0	-2.75704	1		1			2
WARS	0.997225	0.019756	1	-1.15177	#N/A	-0.85133	#N/A	#N/A	2	0		0			0	-1.00155	1		0			1
RPL21	1.00029	0.0381521	1	-1.90546	#N/A	#N/A	#N/A	#N/A	1	0					0	-1.90546	1					1
COL1A2	1.00011	0.248419	0	5.52033	5.27579	-1.75197	1.05905	-1.24788	5	1	1	0	1	0	3	1.77107	1	1	1	1	1	5
C3	1.00013	0.122692	0	8.74658	7.28017	-1.19073	1.19188	0.0283077	5	1	1	0	1	1	4	3.21124	1	1	1	1	0	4
HEL-S-62p	0	0	0	8.74658	7.28017	-1.19073	1.19188	0.0283077	5	1	1	0	1	1	4	3.21124	1	1	1	1	0	4
AEBP1	1.00029	0.223464	0	4.96582	3.83174	1.49081	0.871435	-2.3802	5	1	1	1	1	0	4	1.75592	1	1	1	0	1	4
SRGN	1.00006	0.901641	0	1.36937	1.88555	2.2202	1.60199	-0.245229	5	1	1	1	1	0	4	1.36638	1	1	1	1	0	4
PRG1	0	0	0	1.36937	1.88555	2.2202	1.60199	-0.245229	5	1	1	1	1	0	4	1.36638	1	1	1	1	0	4
CLSTN1	1.00031	0.619312	0	1.43877	1.92705	1.02203	0.507647	-1.01797	5	1	1	1	1	0	4	0.775508	1	1	1	0	1	4
FN1	1.0002	0.200686	0	4.25776	7.59671	-3.30933	0.919067	-1.7739	5	1	1	0	1	0	3	1.53806	1	1	1	0	1	4
C1R	0.999109	0.322192	0	5.60631	3.93924	-1.10868	-1.49386	0.366882	5	1	1	0	0	1	3	1.46198	1	1	1	1	0	4
GOT1	1.00172	0.475042	0	-1.47125	-1.8282	-1.65136	0.138218	-2.15849	5	0	0	0	1	0	1	-1.39422	1	1	1	0	1	4
GIG18	0	0	0	-1.47125	-1.8282	-1.65136	0.138218	-2.15849	5	0	0	0	1	0	1	-1.39422	1	1	1	0	1	4
HIST1H2BM	1.00807	0.519031	0	-3.37976	-3.95508	-1.79944	0.0644764	-1.97629	5	0	0	0	1	0	1	-2.20922	1	1	1	0	1	4
HIST1H2BI	1.00486	0.678138	0	-3.37976	-3.95508	-1.79944	0.0644764	-1.97629	5	0	0	0	1	0	1	-2.20922	1	1	1	0	1	4
HIST1H2BL	1.00252	0.899007	0	-3.37976	-3.95508	-1.79944	0.0644764	-1.97629	5	0	0	0	1	0	1	-2.20922	1	1	1	0	1	4
HIST1H2BK	0.999699	0.112348	0	-3.37976	-3.95508	-1.79944	0.0644764	-1.97629	5	0	0	0	1	0	1	-2.20922	1	1	1	0	1	4
HIST1H2BC	0.999243	0.794562	0	-3.37976	-3.95508	-1.79944	0.0644764	-1.97629	5	0	0	0	1	0	1	-2.20922	1	1	1	0	1	4
HIST1H2BD	0.998886	0.23142	0	-3.37976	-3.95508	-1.79944	0.0644764	-1.97629	5	0	0	0	1	0	1	-2.20922	1	1	1	0	1	4
HIST1H2BH	0.998275	0.5875	0	-3.37976	-3.95508	-1.79944	0.0644764	-1.97629	5	0	0	0	1	0	1	-2.20922	1	1	1	0	1	4
HIST2H2BF	0.986853	0.494268	0	-3.37976	-3.95508	-1.79944	0.0644764	-1.97629	5	0	0	0	1	0	1	-2.20922	1	1	1	0	1	4
HIST1H2BN	0.969554	0.433996	0	-3.37976	-3.95508	-1.79944	0.0644764	-1.97629	5	0	0	0	1	0	1	-2.20922	1	1	1	0	1	4
H2BFS	0.878847	0.17905	0	-3.37976	-3.95508	-1.79944	0.0644764	-1.97629	5	0	0	0	1	0	1	-2.20922	1	1	1	0	1	4
BGN	1.00017	0.114182	0	4.17134	4.29917	0.778573	1.12507	0.876889	5	1	1	1	1	1	5	2.25021	1	1	0	1	0	3
NUCB1	1.00006	0.932891	0	3.8629	3.45979	-1.2043	0.947484	0.664015	5	1	1	0	1	1	4	1.54598	1	1	1	0	0	3
GSN	1.00078	0.339983	0	5.54455	3.57371	-2.10296	0.00998745	0.598945	5	1	1	0	1	1	4	1.52484	1	1	1	0	0	3
LOX	1.00322	0.120234	0	4.43051	3.34967	0.995841	0.262614	-1.43214	5	1	1	1	1	0	4	1.5213	1	1	0	0	1	3
SERPINF1	1.00085	0.190239	0	3.49523	4.33559	-2.22633	0.913641	0.888952	5	1	1	0	1	1	4	1.48142	1	1	1	0	0	3
PLOD1	1.00047	0.634327	0	3.96279	3.15722	0.712914	0.231283	-1.11428	5	1	1	1	1	0	4	1.38999	1	1	0	0	1	3
PTX3	1.00078	0.529298	0	2.4461	1.21241	3.57869	0.290709	-0.696707	5	1	1	1	1	0	4	1.36624	1	1	1	0	0	3
COL1A1	1.00005	0.165772	0	1.79985	2.46273	-0.0852414	1.02049	0.0948768	5	1	1	0	1	1	4	1.05854	1	1	0	1	0	3
APP	0.999856	0.694959	0	1.25565	0.786799	1.85373	0.194566	-1.22612	5	1	1	1	1	0	4	0.572922	1	0	1	0	1	3
COTL1	1.00094	0.739831	0	2.9026	1.61136	0.119106	-0.131089	-1.76832	5	1	1	1	0	0	3	0.546732	1	1	0	0	1	3
B2M	0.999985	0.825407	0	1.43989	1.79491	-1.06476	0.882425	-0.514485	5	1	1	0	1	0	3	0.507595	1	1	1	0	0	3
MFGE8	1.00005	0.918616	0	2.25784	0.387858	1.11117	-1.10757	-0.162818	5	1	1	1	0	0	3	0.497296	1	0	1	1	0	3
okuribin	0	0	0	2.22801	1.77149	-1.96822	0.741	-0.394694	5	1	1	0	1	0	3	0.475517	1	1	1	0	0	3
FABP5	1.00254	0.482016	0	2.86714	0.991698	1.03541	-0.161417	-2.48548	5	1	1	1	0	0	3	0.44947	1	0	1	0	1	3
MMP2	1.00047	0.146266	0	1.06069	1.40941	-1.012	0.846045	-0.111626	5	1	1	0	1	0	3	0.438503	1	1	1	0	0	3
SRPX	1.0052	0.242189	0	2.62881	0.132495	1.07463	-1.04655	-0.742041	5	1	1	1	0	0	3	0.409467	1	0	1	1	0	3
HEL-S-83p	0	0	0	2.62881	0.132495	1.07463	-1.04655	-0.742041	5	1	1	1	0	0	3	0.409467	1	0	1	1	0	3
TNC	0	0	0	0.0230383	-2.29193	3.54626	-1.71186	0.302921	5	1	0	1	0	1	3	-0.0263134	0	1	1	1	0	3
TNC variant protein	0	0	0	0.0230383	-2.29193	3.54626	-1.71186	0.302921	5	1	0	1	0	1	3	-0.0263134	0	1	1	1	0	3
HSP90AB1	0.999806	0.056472	0	1.336	0.268585	1.06109	-0.447482	-2.66219	5	1	1	1	0	0	3	-0.0887991	1	0	1	0	1	3
IGF2R	0	0	0	0.00707045	-1.56261	5.12368	-1.30764	-0.156563	5	1	0	1	0	0	2	0.420787	0	1	1	1	0	3
PGAM1	1.0001	0.953802	0	1.88753	1.16776	-0.444755	-0.0593153	-2.49642	5	1	1	0	0	0	2	0.0109594	1	1	0	0	1	3
VIM	1.00007	0.723856	0	2.84455	1.84046	-0.91911	-0.398836	-3.50618	5	1	1	0	0	0	2	-0.0278239	1	1	0	0	1	3
HEL113	0	0	0	2.84455	1.84046	-0.91911	-0.398836	-3.50618	5	1	1	0	0	0	2	-0.0278239	1	1	0	0	1	3
HEL-S-22	0	0	0	1.32683	1.34116	-0.596953	-0.168356	-2.76567	5	1	1	0	0	0	2	-0.172598	1	1	0	0	1	3
HEL-S-22;GSTP1	0	0	0	1.32683	1.34116	-0.596953	-0.168356	-2.76567	5	1	1	0	0	0	2	-0.172598	1	1	0	0	1	3
ENO1	1.00006	0.647023	0	1.95416	1.47028	-0.754851	-0.0943761	-3.63371	5	1	1	0	0	0	2	-0.211702	1	1	0	0	1	3
HIST3H3	1.25772	0.102419	0	-4.96185	-5.16032	-1.00478	0.472473	0.450273	5	0	0	0	1	1	2	-2.04084	1	1	1	0	0	3
H3F3C	1.02698	0.555878	0	-4.96185	-5.16032	-1.00478	0.472473	0.450273	5	0	0	0	1	1	2	-2.04084	1	1	1	0	0	3
H3F3B	1.00023	0.685217	0	-4.96185	-5.16032	-1.00478	0.472473	0.450273	5	0	0	0	1	1	2	-2.04084	1	1	1	0	0	3
H3F3A	0.999342	0.623752	0	-4.96185	-5.16032	-1.00478	0.472473	0.450273	5	0	0	0	1	1	2	-2.04084	1	1	1	0	0	3
PLAT	0	0	0	-0.940832	-2.52477	6.29717	-1.04551	-0.161545	5	0	0	1	0	0	1	0.324904	0	1	1	1	0	3
COL12A1	0	0	0	-0.051532	-1.70928	1.45819	-1.19471	-0.299011	5	0	0	1	0	0	1	-0.359268	0	1	1	1	0	3
HEL-S-70	0	0	0	-0.941367	-2.42423	1.38012	-0.537234	-1.22337	5	0	0	1	0	0	1	-0.749216	0	1	1	0	1	3
VCP	0	0	0	-0.941367	-2.42423	1.38012	-0.537234	-1.22337	5	0	0	1	0	0	1	-0.749216	0	1	1	0	1	3
CCT4	1.00067	0.280412	0	-1.0132	-1.52139	0.259905	-0.530373	-1.06666	5	0	0	1	0	0	1	-0.774344	1	1	0	0	1	3
RPLP1	0.999991	0.883532	0	-1.15445	-1.61615	-0.347924	0.30633	-1.12794	5	0	0	0	1	0	1	-0.788027	1	1	0	0	1	3
HSPA8	0.99986	0.463041	0	-1.01119	-1.87696	0.353614	-0.189808	-2.04235	5	0	0	1	0	0	1	-0.953338	1	1	0	0	1	3
HEL-S-72p	0	0	0	-1.01119	-1.87696	0.353614	-0.189808	-2.04235	5	0	0	1	0	0	1	-0.953338	1	1	0	0	1	3
PDIA6	0.999665	0.649804	0	-1.91525	-2.43401	-1.03856	-0.31122	0.29918	5	0	0	0	0	1	1	-1.07997	1	1	1	0	0	3
CAP1	0.999902	0.787717	0	-1.33125	-1.97922	-0.316797	0.271975	-2.77201	5	0	0	0	1	0	1	-1.22546	1	1	0	0	1	3
ANXA5	1.0008	0.172121	0	-2.43547	-3.66941	-1.35805	-0.575927	0.0220286	5	0	0	0	0	1	1	-1.60337	1	1	1	0	0	3
HEL-S-7	0	0	0	-2.43547	-3.66941	-1.35805	-0.575927	0.0220286	5	0	0	0	0	1	1	-1.60337	1	1	1	0	0	3
EEF1G	1.02106	0.476361	0	-1.02362	-1.57403	-0.107091	-0.0676969	-1.02472	5	0	0	0	0	0	0	-0.75943	1	1	0	0	1	3
CD109	0.999566	0.907356	0	-1.41359	-1.3528	-1.59297	-0.283509	-0.00222056	5	0	0	0	0	0	0	-0.929019	1	1	1	0	0	3
DBI	0	0	0	-0.589523	-1.62524	-1.07713	-0.163182	-1.34079	5	0	0	0	0	0	0	-0.959172	0	1	1	0	1	3
HEL-S-49	0	0	0	-0.477714	-1.35592	-1.14071	-0.00223752	-1.83411	5	0	0	0	0	0	0	-0.962138	0	1	1	0	1	3
TPI1	0	0	0	-0.477714	-1.35592	-1.14071	-0.00223752	-1.83411	5	0	0	0	0	0	0	-0.962138	0	1	1	0	1	3
RPLP2	1.00009	0.175651	0	-1.14009	-2.12748	-0.414395	-0.21987	-1.2602	5	0	0	0	0	0	0	-1.03241	1	1	0	0	1	3
CALM3	1.00042	0.420949	0	-1.28462	-1.90418	-0.4672	-0.0795834	-1.54224	5	0	0	0	0	0	0	-1.05556	1	1	0	0	1	3
CALM2	1.00038	0.558796	0	-1.28462	-1.90418	-0.4672	-0.0795834	-1.54224	5	0	0	0	0	0	0	-1.05556	1	1	0	0	1	3
CALM1	0.99899	0.286795	0	-1.28462	-1.90418	-0.4672	-0.0795834	-1.54224	5	0	0	0	0	0	0	-1.05556	1	1	0	0	1	3
CSTB	0	0	0	-0.602047	-1.70539	-1.33163	-0.148281	-1.68035	5	0	0	0	0	0	0	-1.09354	0	1	1	0	1	3
ANXA1	1.00026	0.640514	0	-1.34881	-2.29522	-1.5901	-0.18328	-0.20401	5	0	0	0	0	0	0	-1.12429	1	1	1	0	0	3
HEL-S-32	0	0	0	-0.94448	-1.54084	-1.08333	-0.0690004	-2.13388	5	0	0	0	0	0	0	-1.15431	0	1	1	0	1	3
MDH1	0	0	0	-0.94448	-1.54084	-1.08333	-0.0690004	-2.13388	5	0	0	0	0	0	0	-1.15431	0	1	1	0	1	3
MIF	1.00007	0.564249	0	-1.00141	-2.14786	-0.906297	-0.431186	-1.54926	5	0	0	0	0	0	0	-1.2072	1	1	0	0	1	3
SNRPD3	0.998066	0.251272	0	-1.12438	-2.47313	-0.142284	-0.766466	-1.71341	5	0	0	0	0	0	0	-1.24394	1	1	0	0	1	3
GOT2	0	0	0	-0.722601	-1.55476	-1.12487	-0.121023	-2.77759	5	0	0	0	0	0	0	-1.26017	0	1	1	0	1	3
HSPD1	0.999634	0.602418	0	-1.54516	-2.51787	-0.533571	-0.210596	-1.53854	5	0	0	0	0	0	0	-1.26915	1	1	0	0	1	3
EPFP1	0	0	0	-0.59392	-1.28659	-1.57128	-0.0209667	-4.59072	5	0	0	0	0	0	0	-1.6127	0	1	1	0	1	3
HSPE1	0	0	0	-0.59392	-1.28659	-1.57128	-0.0209667	-4.59072	5	0	0	0	0	0	0	-1.6127	0	1	1	0	1	3
HSPE1-MOB4	0	0	0	-0.59392	-1.28659	-1.57128	-0.0209667	-4.59072	5	0	0	0	0	0	0	-1.6127	0	1	1	0	1	3
USP14	0	0	0	-0.965298	-2.13815	-1.67909	-0.318804	-3.35732	5	0	0	0	0	0	0	-1.69173	0	1	1	0	1	3
LRP1	1.00157	0.375717	0	1.60093	1.2698	0.755951	0.0296078	0.289823	5	1	1	1	1	1	5	0.789222	1	1	0	0	0	2
NID2	1.00505	0.358144	0	6.85112	4.27299	0.0904861	-0.30905	0.346919	5	1	1	1	0	1	4	2.25049	1	1	0	0	0	2
CFH	1.00328	0.335663	0	5.09705	4.36092	0.454742	0.317079	-0.0688324	5	1	1	1	1	0	4	2.03219	1	1	0	0	0	2
hCG_40889	0	0	0	5.09705	4.36092	0.454742	0.317079	-0.0688324	5	1	1	1	1	0	4	2.03219	1	1	0	0	0	2
HF	0	0	0	5.09705	4.36092	0.454742	0.317079	-0.0688324	5	1	1	1	1	0	4	2.03219	1	1	0	0	0	2
MMP1	0	0	0	0.808095	0.273661	9.09909	0.386259	-1.30943	5	1	1	1	1	0	4	1.85153	0	0	1	0	1	2
COL6A3	1.00104	0.272181	0	3.7211	3.07299	-0.283429	0.011623	0.505976	5	1	1	0	1	1	4	1.40565	1	1	0	0	0	2
LOXL2	1.00153	0.579505	0	2.1757	2.05326	0.674815	0.415001	-0.688956	5	1	1	1	1	0	4	0.925963	1	1	0	0	0	2
LAMA4	1.00448	0.484929	0	2.93836	1.73147	0.103813	-0.464655	0.179883	5	1	1	1	0	1	4	0.897774	1	1	0	0	0	2
COL6A1	1.00014	0.450227	0	2.43109	2.12782	-0.966435	0.0670841	0.728325	5	1	1	0	1	1	4	0.877577	1	1	0	0	0	2
ZMYM3	0.998459	0.542197	0	2.75428	1.37934	0.351872	-0.349155	0.134873	5	1	1	1	0	1	4	0.854242	1	1	0	0	0	2
COL6A2	1.00017	0.402501	0	2.31519	1.72749	-0.656067	0.398511	0.450754	5	1	1	0	1	1	4	0.847177	1	1	0	0	0	2
PCOLCE	1.00087	0.131697	0	1.86505	1.94267	-0.953937	0.694678	0.385112	5	1	1	0	1	1	4	0.786715	1	1	0	0	0	2
SPARC	1.0001	0.195104	0	1.35867	1.73726	-0.606677	0.957803	0.251161	5	1	1	0	1	1	4	0.739644	1	1	0	0	0	2
DKFZp686O12165	0	0	0	2.69301	1.08743	0.420968	-0.770887	0.0648081	5	1	1	1	0	1	4	0.699066	1	1	0	0	0	2
FN1;DKFZp686O12165	0	0	0	2.69301	1.08743	0.420968	-0.770887	0.0648081	5	1	1	1	0	1	4	0.699066	1	1	0	0	0	2
ECM1	1.00247	0.239687	0	1.24487	0.634578	-1.56704	0.65395	0.330309	5	1	1	0	1	1	4	0.259332	1	0	1	0	0	2
FBLN1	1.00068	0.342777	0	8.55121	8.20335	-0.470486	0.0147315	-0.30745	5	1	1	0	1	0	3	3.19827	1	1	0	0	0	2
NID1	1.0032	0.254696	0	5.42716	5.0605	0.51237	-0.517289	-0.0589982	5	1	1	1	0	0	3	2.08475	1	1	0	0	0	2
LAMB2	1.00086	0.431438	0	4.61354	3.51402	-0.509112	-0.60183	0.0856136	5	1	1	0	0	1	3	1.42045	1	1	0	0	0	2
PXDN	1.00148	0.233541	0	3.20739	3.14389	0.704492	-0.0392637	-0.354458	5	1	1	1	0	0	3	1.33241	1	1	0	0	0	2
EFEMP1	1.00208	0.190767	0	2.855	1.84474	-0.422076	-0.252055	0.266004	5	1	1	0	0	1	3	0.858322	1	1	0	0	0	2
CFL1	1.00035	0.331021	0	1.59944	0.780771	0.354922	-0.227754	-2.90779	5	1	1	1	0	0	3	-0.080081	1	0	0	0	1	2
HEL-S-15	0	0	0	1.59944	0.780771	0.354922	-0.227754	-2.90779	5	1	1	1	0	0	3	-0.080081	1	0	0	0	1	2
ERAP1	0	0	0	0.173682	0.141092	-1.49055	0.598476	-2.04442	5	1	1	0	1	0	3	-0.524344	0	0	1	0	1	2
ARTS-1	0	0	0	0.173682	0.141092	-1.49055	0.598476	-2.04442	5	1	1	0	1	0	3	-0.524344	0	0	1	0	1	2
QSOX1	0	0	0	-0.19062	-0.686423	1.71377	0.380747	-1.31039	5	0	0	1	1	0	2	-0.0185834	0	0	1	0	1	2
BPGF-1	0	0	0	-0.19062	-0.686423	1.71377	0.380747	-1.31039	5	0	0	1	1	0	2	-0.0185834	0	0	1	0	1	2
FSTL1	1.00117	0.353796	0	-1.07285	-0.829657	-0.831776	0.993505	1.31493	5	0	0	0	1	1	2	-0.0851696	1	0	0	0	1	2
PFN1	1.00021	0.0930816	0	1.41561	0.609558	-0.253198	-0.0835872	-2.22243	5	1	1	0	0	0	2	-0.10681	1	0	0	0	1	2
SDCBP	0	0	0	0.536091	-1.73767	1.24245	-0.610268	-0.133125	5	1	0	1	0	0	2	-0.140504	0	1	1	0	0	2
ACTN1	1.00085	0.600075	0	-1.14418	-1.65249	0.115042	-0.104282	0.213173	5	0	0	1	0	1	2	-0.514547	1	1	0	0	0	2
TXNDC5	0.989092	0.279248	0	-1.22064	-1.70286	-0.343034	0.119703	0.292791	5	0	0	0	1	1	2	-0.570807	1	1	0	0	0	2
hCG_1811539	0	0	0	-1.22064	-1.70286	-0.343034	0.119703	0.292791	5	0	0	0	1	1	2	-0.570807	1	1	0	0	0	2
STRF8	0	0	0	-1.22064	-1.70286	-0.343034	0.119703	0.292791	5	0	0	0	1	1	2	-0.570807	1	1	0	0	0	2
DKFZp666I134	0	0	0	-1.22064	-1.70286	-0.343034	0.119703	0.292791	5	0	0	0	1	1	2	-0.570807	1	1	0	0	0	2
HNRPF	0	0	0	-0.377012	-1.33021	0.113035	0.0965285	-1.40777	5	0	0	1	1	0	2	-0.581086	0	1	0	0	1	2
HNRNPF	0	0	0	-0.377012	-1.33021	0.113035	0.0965285	-1.40777	5	0	0	1	1	0	2	-0.581086	0	1	0	0	1	2
HNRNPH1	0	0	0	-0.377012	-1.33021	0.113035	0.0965285	-1.40777	5	0	0	1	1	0	2	-0.581086	0	1	0	0	1	2
DKFZp686A15170	0	0	0	-0.377012	-1.33021	0.113035	0.0965285	-1.40777	5	0	0	1	1	0	2	-0.581086	0	1	0	0	1	2
FLNC	1.00364	0.168071	0	-1.56681	-2.28704	-0.347058	0.195735	0.708588	5	0	0	0	1	1	2	-0.659317	1	1	0	0	0	2
EEF1A1	0	0	0	0.132988	-1.29536	0.163171	-0.610799	-1.83877	5	1	0	1	0	0	2	-0.689754	0	1	0	0	1	2
EEF1A1P5	0	0	0	0.132988	-1.29536	0.163171	-0.610799	-1.83877	5	1	0	1	0	0	2	-0.689754	0	1	0	0	1	2
EEF1A1L14	0	0	0	0.132988	-1.29536	0.163171	-0.610799	-1.83877	5	1	0	1	0	0	2	-0.689754	0	1	0	0	1	2
PTI-1	0	0	0	0.132988	-1.29536	0.163171	-0.610799	-1.83877	5	1	0	1	0	0	2	-0.689754	0	1	0	0	1	2
PSMA4	0.994567	0.125502	0	-1.64731	-2.11298	-0.241628	0.0209454	0.121063	5	0	0	0	1	1	2	-0.771982	1	1	0	0	0	2
IQGAP1	0.998654	0.424752	0	-1.64553	-2.07247	-0.99891	0.365126	0.0333701	5	0	0	0	1	1	2	-0.863682	1	1	0	0	0	2
hCG_1991735	0	0	0	-1.64553	-2.07247	-0.99891	0.365126	0.0333701	5	0	0	0	1	1	2	-0.863682	1	1	0	0	0	2
HIST1H4A	1.01944	0.664623	0	-4.90213	-5.14073	-0.929822	0.478135	0.465199	5	0	0	0	1	1	2	-2.00587	1	1	0	0	0	2
HIST1H4H	0.999424	0.637856	0	-4.90213	-5.14073	-0.929822	0.478135	0.465199	5	0	0	0	1	1	2	-2.00587	1	1	0	0	0	2
HEXA	0	0	0	-0.0411931	-0.230661	-1.07686	0.531199	-1.53778	5	0	0	0	1	0	1	-0.47106	0	0	1	0	1	2
AKR1B1	0.998849	0.424895	0	-1.23392	-1.76747	-0.477308	-0.206564	0.959696	5	0	0	0	0	1	1	-0.545115	1	1	0	0	0	2
CORO1C	0	0	0	-0.738442	-1.11569	0.328377	-0.0190056	-1.1813	5	0	0	1	0	0	1	-0.545212	0	1	0	0	1	2
RPL10A	0	0	0	-0.0888397	-1.00921	0.262433	-0.0650966	-2.09837	5	0	0	1	0	0	1	-0.599817	0	1	0	0	1	2
EEF2	0	0	0	-0.709158	-1.31748	0.164494	-0.0680569	-1.38018	5	0	0	1	0	0	1	-0.662076	0	1	0	0	1	2
HEL-S-270	0	0	0	0.202017	-0.690091	-1.27431	-0.307905	-1.2895	5	1	0	0	0	0	1	-0.67196	0	0	1	0	1	2
ANXA2	0	0	0	0.202017	-0.690091	-1.27431	-0.307905	-1.2895	5	1	0	0	0	0	1	-0.67196	0	0	1	0	1	2
ANXA2P2	0	0	0	0.202017	-0.690091	-1.27431	-0.307905	-1.2895	5	1	0	0	0	0	1	-0.67196	0	0	1	0	1	2
HNRPH3	0	0	0	-0.535185	-1.51116	0.712191	-0.205603	-2.04678	5	0	0	1	0	0	1	-0.717307	0	1	0	0	1	2
HNRNPH3	0	0	0	-0.535185	-1.51116	0.712191	-0.205603	-2.04678	5	0	0	1	0	0	1	-0.717307	0	1	0	0	1	2
HEL-S-44	0	0	0	-0.692476	-1.11634	-0.908233	0.0247897	-1.4329	5	0	0	0	1	0	1	-0.825032	0	1	0	0	1	2
SOD1	0	0	0	-0.692476	-1.11634	-0.908233	0.0247897	-1.4329	5	0	0	0	1	0	1	-0.825032	0	1	0	0	1	2
UBB	0	0	0	-0.999235	-1.68165	-0.127971	0.0376619	-1.42821	5	0	0	0	1	0	1	-0.83988	0	1	0	0	1	2
RPS27A	0	0	0	-0.999235	-1.68165	-0.127971	0.0376619	-1.42821	5	0	0	0	1	0	1	-0.83988	0	1	0	0	1	2
UBC	0	0	0	-0.999235	-1.68165	-0.127971	0.0376619	-1.42821	5	0	0	0	1	0	1	-0.83988	0	1	0	0	1	2
UBA52	0	0	0	-0.999235	-1.68165	-0.127971	0.0376619	-1.42821	5	0	0	0	1	0	1	-0.83988	0	1	0	0	1	2
HEL112	0	0	0	-0.999235	-1.68165	-0.127971	0.0376619	-1.42821	5	0	0	0	1	0	1	-0.83988	0	1	0	0	1	2
DKFZp434K0435	0	0	0	-0.999235	-1.68165	-0.127971	0.0376619	-1.42821	5	0	0	0	1	0	1	-0.83988	0	1	0	0	1	2
MDH2	0	0	0	-0.469746	-0.96611	-1.06444	0.278974	-1.98251	5	0	0	0	1	0	1	-0.840767	0	0	1	0	1	2
ACTN4	1.00016	0.133169	0	-1.4619	-2.12173	-0.242135	0.0725171	-0.471334	5	0	0	0	1	0	1	-0.844917	1	1	0	0	0	2
PSMA5	0.994822	0.138584	0	-1.5989	-2.40768	0.0334763	-0.0735563	-0.237441	5	0	0	1	0	0	1	-0.856822	1	1	0	0	0	2
VCL	1.0005	0.744819	0	-1.04529	-1.71102	-0.859557	0.0688935	-0.75621	5	0	0	0	1	0	1	-0.860636	1	1	0	0	0	2
HEL114	0	0	0	-1.04529	-1.71102	-0.859557	0.0688935	-0.75621	5	0	0	0	1	0	1	-0.860636	1	1	0	0	0	2
GDI2	0	0	0	-0.734149	-1.27521	-0.761829	0.0125014	-1.76549	5	0	0	0	1	0	1	-0.904835	0	1	0	0	1	2
CUTA	0	0	0	-0.875893	-1.32053	-0.849568	0.243601	-1.82688	5	0	0	0	1	0	1	-0.925854	0	1	0	0	1	2
NME1	0	0	0	-0.71658	-1.40185	-0.480865	0.150349	-2.19654	5	0	0	0	1	0	1	-0.929099	0	1	0	0	1	2
NME1-NME2	0	0	0	-0.648103	-1.50689	-0.692349	0.117532	-1.9536	5	0	0	0	1	0	1	-0.936683	0	1	0	0	1	2
NME2	0	0	0	-0.648103	-1.50689	-0.692349	0.117532	-1.9536	5	0	0	0	1	0	1	-0.936683	0	1	0	0	1	2
NME2P1	0	0	0	-0.648103	-1.50689	-0.692349	0.117532	-1.9536	5	0	0	0	1	0	1	-0.936683	0	1	0	0	1	2
HPRT1	0	0	0	-0.964301	-1.51152	-0.876212	0.0449018	-2.1982	5	0	0	0	1	0	1	-1.10107	0	1	0	0	1	2
ANPEP	1.00024	0.697974	0	-2.02409	-3.17863	-0.916689	-0.315774	0.548606	5	0	0	0	0	1	1	-1.17732	1	1	0	0	0	2
NPM1	1.00009	0.786958	0	-1.93263	-2.94275	0.138485	-0.478111	-0.686052	5	0	0	1	0	0	1	-1.18021	1	1	0	0	0	2
HIST1H2AA	17.0294	0.255628	0	-3.24246	-4.38551	-0.653329	0.231237	-0.815344	5	0	0	0	1	0	1	-1.77308	1	1	0	0	0	2
HIST1H2AJ	1.00662	0.599181	0	-3.24246	-4.38551	-0.653329	0.231237	-0.815344	5	0	0	0	1	0	1	-1.77308	1	1	0	0	0	2
HIST1H2AH	1.00519	0.817865	0	-3.24246	-4.38551	-0.653329	0.231237	-0.815344	5	0	0	0	1	0	1	-1.77308	1	1	0	0	0	2
HIST2H2AC	1.00147	0.748901	0	-3.24246	-4.38551	-0.653329	0.231237	-0.815344	5	0	0	0	1	0	1	-1.77308	1	1	0	0	0	2
HIST1H2AB	1.00052	0.983252	0	-3.24246	-4.38551	-0.653329	0.231237	-0.815344	5	0	0	0	1	0	1	-1.77308	1	1	0	0	0	2
H2AFJ	1.00033	0.897768	0	-3.24246	-4.38551	-0.653329	0.231237	-0.815344	5	0	0	0	1	0	1	-1.77308	1	1	0	0	0	2
H2AFX	1.00003	0.948393	0	-3.24246	-4.38551	-0.653329	0.231237	-0.815344	5	0	0	0	1	0	1	-1.77308	1	1	0	0	0	2
HIST1H2AC	0.999412	0.339704	0	-3.24246	-4.38551	-0.653329	0.231237	-0.815344	5	0	0	0	1	0	1	-1.77308	1	1	0	0	0	2
HIST3H2A	0.999321	0.294484	0	-3.24246	-4.38551	-0.653329	0.231237	-0.815344	5	0	0	0	1	0	1	-1.77308	1	1	0	0	0	2
HIST1H2AD	0.99746	0.647322	0	-3.24246	-4.38551	-0.653329	0.231237	-0.815344	5	0	0	0	1	0	1	-1.77308	1	1	0	0	0	2
HIST1H2AG	0.983925	0.226475	0	-3.24246	-4.38551	-0.653329	0.231237	-0.815344	5	0	0	0	1	0	1	-1.77308	1	1	0	0	0	2
HIST1H2AK	0	0	0	-3.24246	-4.38551	-0.653329	0.231237	-0.815344	5	0	0	0	1	0	1	-1.77308	1	1	0	0	0	2
HIST2H2AA3	0	0	0	-3.24246	-4.38551	-0.653329	0.231237	-0.815344	5	0	0	0	1	0	1	-1.77308	1	1	0	0	0	2
TXNRD1	0	0	0	-0.508927	-1.03497	-0.62498	-0.0354646	-1.44326	5	0	0	0	0	0	0	-0.72952	0	1	0	0	1	2
CD59	1	0.997052	0	-1.05576	-2.15049	-0.459944	-0.122725	-0.0780948	5	0	0	0	0	0	0	-0.773401	1	1	0	0	0	2
PSMA6	0.981495	0.196511	0	-1.47558	-2.22186	-0.11241	-0.0166288	-0.180963	5	0	0	0	0	0	0	-0.801489	1	1	0	0	0	2
HEL107	0	0	0	-0.0376512	-1.46748	-0.835486	-0.244372	-1.47216	5	0	0	0	0	0	0	-0.811431	0	1	0	0	1	2
TKT	0	0	0	-0.0376512	-1.46748	-0.835486	-0.244372	-1.47216	5	0	0	0	0	0	0	-0.811431	0	1	0	0	1	2
MARCKS	0	0	0	-0.0365111	-1.27882	-0.508013	-0.131936	-2.12017	5	0	0	0	0	0	0	-0.81509	0	1	0	0	1	2
DDT	0	0	0	-0.464673	-0.984948	-1.22579	-0.214379	-1.22795	5	0	0	0	0	0	0	-0.823547	0	0	1	0	1	2
DDTL	0	0	0	-0.464673	-0.984948	-1.22579	-0.214379	-1.22795	5	0	0	0	0	0	0	-0.823547	0	0	1	0	1	2
LXN	0	0	0	-0.267971	-0.78095	-1.02795	-0.309967	-2.0191	5	0	0	0	0	0	0	-0.881189	0	0	1	0	1	2
HEL-S-67p	0	0	0	-0.606936	-1.26391	-0.645388	-0.0415302	-1.99147	5	0	0	0	0	0	0	-0.909847	0	1	0	0	1	2
PARK7	0	0	0	-0.606936	-1.26391	-0.645388	-0.0415302	-1.99147	5	0	0	0	0	0	0	-0.909847	0	1	0	0	1	2
HEL-S-21	0	0	0	-0.440975	-1.13524	-0.441008	-0.287117	-2.26163	5	0	0	0	0	0	0	-0.913194	0	1	0	0	1	2
GSTO1	0	0	0	-0.440975	-1.13524	-0.441008	-0.287117	-2.26163	5	0	0	0	0	0	0	-0.913194	0	1	0	0	1	2
LDHB	0	0	0	-0.931855	-1.51268	-0.668822	-0.0117854	-2.06444	5	0	0	0	0	0	0	-1.03792	0	1	0	0	1	2
TAGLN2	0	0	0	-0.486865	-1.10506	-0.686506	-0.0793297	-2.90207	5	0	0	0	0	0	0	-1.05197	0	1	0	0	1	2
PRDX1	0	0	0	-0.848333	-1.65531	-0.492673	-0.190486	-2.13359	5	0	0	0	0	0	0	-1.06408	0	1	0	0	1	2
PDIA3	0.999779	0.538396	0	-1.70941	-2.57772	-0.612229	-0.308084	-0.505406	5	0	0	0	0	0	0	-1.14257	1	1	0	0	0	2
HEL-S-269	0	0	0	-1.70941	-2.57772	-0.612229	-0.308084	-0.505406	5	0	0	0	0	0	0	-1.14257	1	1	0	0	0	2
HSP90B1	0.999805	0.504342	0	-1.73518	-2.91666	-0.000842433	-0.428083	-0.811	5	0	0	0	0	0	0	-1.17835	1	1	0	0	0	2
TRA1	0	0	0	-1.73518	-2.91666	-0.000842433	-0.428083	-0.811	5	0	0	0	0	0	0	-1.17835	1	1	0	0	0	2
HEL-S-125m	0	0	0	-1.73518	-2.91666	-0.000842433	-0.428083	-0.811	5	0	0	0	0	0	0	-1.17835	1	1	0	0	0	2
HSPA5	0.999654	0.281297	0	-2.30384	-2.97224	-0.0594124	-0.279368	-0.773443	5	0	0	0	0	0	0	-1.27766	1	1	0	0	0	2
HEL-S-89n	0	0	0	-2.30384	-2.97224	-0.0594124	-0.279368	-0.773443	5	0	0	0	0	0	0	-1.27766	1	1	0	0	0	2
CTSB	0	0	0	0.638997	0.475179	2.52787	0.600732	-0.577076	5	1	1	1	1	0	4	0.73314	0	0	1	0	0	1
LAMB1	1.00332	0.223785	0	1.3725	0.508751	0.711161	-0.431259	0.139363	5	1	1	1	0	1	4	0.460103	1	0	0	0	0	1
LAMC1	0.999134	0.359983	0	1.71808	0.723398	0.13522	-0.380492	0.0983175	5	1	1	1	0	1	4	0.458905	1	0	0	0	0	1
PAMR1	0.992734	0.608115	0	2.07663	0.423929	0.0444338	-0.668445	0.0254412	5	1	1	1	0	1	4	0.380398	1	0	0	0	0	1
CST3	0	0	0	0.169775	0.192499	-1.79509	0.895237	0.24835	5	1	1	0	1	1	4	-0.0578451	0	0	1	0	0	1
FBN1	1.00551	0.248314	0	2.01436	0.916989	-0.181259	-0.565262	0.915328	5	1	1	0	0	1	3	0.620032	1	0	0	0	0	1
TIMP1	0	0	0	0.545533	-0.655868	0.556306	-0.196359	2.59142	5	1	0	1	0	1	3	0.568206	0	0	0	0	1	1
PLTP	0	0	0	0.581999	0.610824	-2.07501	0.923797	-0.697434	5	1	1	0	1	0	3	-0.131164	0	0	1	0	0	1
HEL-S-128m	0	0	0	0.701843	0.67274	0.594747	-0.305281	-2.46789	5	1	1	1	0	0	3	-0.160769	0	0	0	0	1	1
PRDX6	0	0	0	0.701843	0.67274	0.594747	-0.305281	-2.46789	5	1	1	1	0	0	3	-0.160769	0	0	0	0	1	1
YWHAQ	0	0	0	0.840439	0.00199123	0.369864	-0.288824	-1.95098	5	1	1	1	0	0	3	-0.205502	0	0	0	0	1	1
CLIC1	0	0	0	0.22606	-0.589084	0.315015	0.545536	-1.78977	5	1	0	1	1	0	3	-0.258449	0	0	0	0	1	1
HEL70	0	0	0	0.866756	0.0881545	-0.647754	0.163754	-3.12601	5	1	1	0	1	0	3	-0.531021	0	0	0	0	1	1
MSN	0	0	0	0.866756	0.0881545	-0.647754	0.163754	-3.12601	5	1	1	0	1	0	3	-0.531021	0	0	0	0	1	1
AGRN	0	0	0	0.602375	-0.493985	2.65182	-0.435498	-0.944922	5	1	0	1	0	0	2	0.275959	0	0	1	0	0	1
THBS1	0	0	0	-0.994438	-0.29352	1.59148	0.511536	-0.67796	5	0	0	1	1	0	2	0.0274188	0	0	1	0	0	1
TIMP2	0	0	0	-0.00720967	-0.814816	-1.01826	0.221134	0.265905	5	0	0	0	1	1	2	-0.270649	0	0	1	0	0	1
HEL-S-30	0	0	0	0.735388	-0.271497	0.0898126	-0.542881	-1.493	5	1	0	1	0	0	2	-0.296435	0	0	0	0	1	1
PKM	0	0	0	0.735388	-0.271497	0.0898126	-0.542881	-1.493	5	1	0	1	0	0	2	-0.296435	0	0	0	0	1	1
PKM2	0	0	0	0.735388	-0.271497	0.0898126	-0.542881	-1.493	5	1	0	1	0	0	2	-0.296435	0	0	0	0	1	1
PS1TP5BP1	0	0	0	-0.132502	-0.661201	0.111632	0.0652983	-1.02679	5	0	0	1	1	0	2	-0.328712	0	0	0	0	1	1
ACTB	0	0	0	-0.132502	-0.661201	0.111632	0.0652983	-1.02679	5	0	0	1	1	0	2	-0.328712	0	0	0	0	1	1
ACTG1	0	0	0	-0.132502	-0.661201	0.111632	0.0652983	-1.02679	5	0	0	1	1	0	2	-0.328712	0	0	0	0	1	1
HEL-176	0	0	0	-0.132502	-0.661201	0.111632	0.0652983	-1.02679	5	0	0	1	1	0	2	-0.328712	0	0	0	0	1	1
CD44	0	0	0	-0.631749	-1.05695	-0.864063	0.745885	0.055381	5	0	0	0	1	1	2	-0.3503	0	1	0	0	0	1
GRN	0	0	0	0.0015987	-0.735248	-0.316897	0.312388	-1.26871	5	1	0	0	1	0	2	-0.401373	0	0	0	0	1	1
EL52	0	0	0	0.986448	-0.0651465	0.139883	-0.0688999	-3.08304	5	1	0	1	0	0	2	-0.418151	0	0	0	0	1	1
HSP90AA1	0	0	0	0.986448	-0.0651465	0.139883	-0.0688999	-3.08304	5	1	0	1	0	0	2	-0.418151	0	0	0	0	1	1
HEXB	0	0	0	-0.222483	-0.741282	0.0585715	0.222839	-1.59808	5	0	0	1	1	0	2	-0.456086	0	0	0	0	1	1
YWHAZ	0	0	0	0.896978	0.0251778	-0.240166	-0.248176	-2.81575	5	1	1	0	0	0	2	-0.476388	0	0	0	0	1	1
CHRDL1	0	0	0	-0.359213	0.22764	-2.0996	0.557056	-0.718664	5	0	1	0	1	0	2	-0.478557	0	0	1	0	0	1
FH	0	0	0	0.188661	-0.276421	-0.756014	0.0644605	-1.63232	5	1	0	0	1	0	2	-0.482326	0	0	0	0	1	1
DKK3	0	0	0	-0.708883	-0.769908	0.592785	0.634621	-2.31094	5	0	0	1	1	0	2	-0.512466	0	0	0	0	1	1
PTBP1	0	0	0	0.133126	-0.878211	0.0420779	-0.317038	-2.00543	5	1	0	1	0	0	2	-0.605095	0	0	0	0	1	1
HEL-S-69p	0	0	0	0.111492	-0.700503	0.147489	-0.0988149	-3.71413	5	1	0	1	0	0	2	-0.850894	0	0	0	0	1	1
PPIA	0	0	0	0.111492	-0.700503	0.147489	-0.0988149	-3.71413	5	1	0	1	0	0	2	-0.850894	0	0	0	0	1	1
TUBA1B	0	0	0	-0.0984564	-0.91959	0.818306	-0.402354	-1.01945	5	0	0	1	0	0	1	-0.324309	0	0	0	0	1	1
TUBA4A	0	0	0	-0.0984564	-0.91959	0.818306	-0.402354	-1.01945	5	0	0	1	0	0	1	-0.324309	0	0	0	0	1	1
STC2	0	0	0	-0.468654	-0.0259288	-0.0288898	0.533579	-1.95411	5	0	0	0	1	0	1	-0.3888	0	0	0	0	1	1
PSAP	0	0	0	-0.0150885	-0.41623	0.00673317	-0.0281345	-1.53506	5	0	0	1	0	0	1	-0.397555	0	0	0	0	1	1
CAPZA1	0	0	0	0.0400483	-0.85199	-0.0869352	-0.138137	-1.05667	5	1	0	0	0	0	1	-0.418736	0	0	0	0	1	1
SFRP1	0	0	0	-0.158277	-0.855674	0.39843	-0.186295	-1.69525	5	0	0	1	0	0	1	-0.499413	0	0	0	0	1	1
PROCR	0	0	0	-0.912856	-0.829862	-0.250043	0.510542	-1.10378	5	0	0	0	1	0	1	-0.5172	0	0	0	0	1	1
TUBB	0	0	0	-0.303715	-0.933883	-0.356036	0.142064	-1.37715	5	0	0	0	1	0	1	-0.565744	0	0	0	0	1	1
TUBB2B	0	0	0	-0.303715	-0.933883	-0.356036	0.142064	-1.37715	5	0	0	0	1	0	1	-0.565744	0	0	0	0	1	1
TUBB2A	0	0	0	-0.303715	-0.933883	-0.356036	0.142064	-1.37715	5	0	0	0	1	0	1	-0.565744	0	0	0	0	1	1
XTP3TPATP1	0	0	0	-0.303715	-0.933883	-0.356036	0.142064	-1.37715	5	0	0	0	1	0	1	-0.565744	0	0	0	0	1	1
DKFZp566F223	0	0	0	-0.303715	-0.933883	-0.356036	0.142064	-1.37715	5	0	0	0	1	0	1	-0.565744	0	0	0	0	1	1
TUBB;TUBB2B;TUBB2A;XTP3TPATP1;TUBB2C;DKFZp566F223	0	0	0	-0.303715	-0.933883	-0.356036	0.142064	-1.37715	5	0	0	0	1	0	1	-0.565744	0	0	0	0	1	1
HEL-S-87p	0	0	0	0.910167	-0.0878298	-0.401125	-0.186244	-3.0831	5	1	0	0	0	0	1	-0.569626	0	0	0	0	1	1
ALDOA	0	0	0	0.910167	-0.0878298	-0.401125	-0.186244	-3.0831	5	1	0	0	0	0	1	-0.569626	0	0	0	0	1	1
HEL-S-39	0	0	0	0.238116	-0.336493	-0.627829	-0.177493	-1.99139	5	1	0	0	0	0	1	-0.579017	0	0	0	0	1	1
PPIB	0	0	0	0.238116	-0.336493	-0.627829	-0.177493	-1.99139	5	1	0	0	0	0	1	-0.579017	0	0	0	0	1	1
MYH9	0	0	0	-0.961126	-1.80411	0.0830666	-0.201298	-0.120203	5	0	0	1	0	0	1	-0.600734	0	1	0	0	0	1
GAPDH	0	0	0	0.451641	-0.898964	-0.183476	-0.459212	-2.13764	5	1	0	0	0	0	1	-0.645531	0	0	0	0	1	1
HEL-S-162eP	0	0	0	0.451641	-0.898964	-0.183476	-0.459212	-2.13764	5	1	0	0	0	0	1	-0.645531	0	0	0	0	1	1
TUBB4B	0	0	0	-0.0841215	-2.38862	0.870434	-0.651497	-0.988508	5	0	0	1	0	0	1	-0.648462	0	1	0	0	0	1
TUBB4A	0	0	0	-0.0841215	-2.38862	0.870434	-0.651497	-0.988508	5	0	0	1	0	0	1	-0.648462	0	1	0	0	0	1
TUBB2C;TUBB4B;TUBB4A	0	0	0	-0.0841215	-2.38862	0.870434	-0.651497	-0.988508	5	0	0	1	0	0	1	-0.648462	0	1	0	0	0	1
HEL2	0	0	0	0.287963	-0.561352	-0.55254	-0.00998793	-2.49859	5	1	0	0	0	0	1	-0.666902	0	0	0	0	1	1
YWHAE	0	0	0	0.287963	-0.561352	-0.55254	-0.00998793	-2.49859	5	1	0	0	0	0	1	-0.666902	0	0	0	0	1	1
YWHAE/FAM22B fusion	0	0	0	0.287963	-0.561352	-0.55254	-0.00998793	-2.49859	5	1	0	0	0	0	1	-0.666902	0	0	0	0	1	1
YWHAE/FAM22A fusion	0	0	0	0.287963	-0.561352	-0.55254	-0.00998793	-2.49859	5	1	0	0	0	0	1	-0.666902	0	0	0	0	1	1
HEL-S-68p	0	0	0	0.582884	-0.125968	-0.183661	-0.0823645	-3.94855	5	1	0	0	0	0	1	-0.751532	0	0	0	0	1	1
PGK1	0	0	0	0.582884	-0.125968	-0.183661	-0.0823645	-3.94855	5	1	0	0	0	0	1	-0.751532	0	0	0	0	1	1
HEL-S-133P	0	0	0	-0.563876	-1.49942	-0.869109	0.0667234	-0.995769	5	0	0	0	1	0	1	-0.77229	0	1	0	0	0	1
LDHA	0	0	0	-0.563876	-1.49942	-0.869109	0.0667234	-0.995769	5	0	0	0	1	0	1	-0.77229	0	1	0	0	0	1
CYCS	0	0	0	-0.195127	-0.540126	-0.129364	-0.0397475	-1.52122	5	0	0	0	0	0	0	-0.485117	0	0	0	0	1	1
UBE2L3	0	0	0	-0.214885	-0.358642	-0.463284	-0.0405601	-1.43935	5	0	0	0	0	0	0	-0.503345	0	0	0	0	1	1
FLNA	0	0	0	-0.906505	-1.74488	-0.37411	-0.193693	-0.0378396	5	0	0	0	0	0	0	-0.651406	0	1	0	0	0	1
FLJ00119	0	0	0	-0.906505	-1.74488	-0.37411	-0.193693	-0.0378396	5	0	0	0	0	0	0	-0.651406	0	1	0	0	0	1
PGD	0	0	0	-0.0508404	-0.756165	-0.510087	-0.0613149	-1.92136	5	0	0	0	0	0	0	-0.659953	0	0	0	0	1	1
HEL-S-2a	0	0	0	-0.00913527	-0.822756	-0.327232	-0.146765	-2.24382	5	0	0	0	0	0	0	-0.709941	0	0	0	0	1	1
PRDX2	0	0	0	-0.00913527	-0.822756	-0.327232	-0.146765	-2.24382	5	0	0	0	0	0	0	-0.709941	0	0	0	0	1	1
HEL-S-34	0	0	0	-0.0469686	-0.685076	-0.822892	-0.121738	-2.0984	5	0	0	0	0	0	0	-0.755015	0	0	0	0	1	1
PEBP1	0	0	0	-0.0469686	-0.685076	-0.822892	-0.121738	-2.0984	5	0	0	0	0	0	0	-0.755015	0	0	0	0	1	1
SYNCRIP	0	0	0	-0.751847	-0.969204	-0.0924479	-0.0891717	-2.60083	5	0	0	0	0	0	0	-0.900701	0	0	0	0	1	1
MMP3	1.0139	0.573986	0	-2.45879	-1.37785	3.79348	1.31166	#N/A	4	0	0	1	1		2	0.317127	1	1	1	1		4
IGFBP6	0	0	0	#N/A	3.40694	-0.393026	1.50187	1.38524	4		1	0	1	1	3	1.47526		1	0	1	1	3
CHI3L1	1.00007	0.590708	0	4.99394	#N/A	0.734883	-3.20337	3.31075	4	1		1	0	1	3	1.45905	1		0	1	1	3
TPP1	0.999476	0.683303	0	2.2895	2.73752	#N/A	0.766745	-2.76739	4	1	1		1	0	3	0.756594	1	1		0	1	3
DDX39A	1.00082	0.349548	0	2.9133	1.85035	#N/A	0.377305	-3.50807	4	1	1		1	0	3	0.408221	1	1		0	1	3
DDX39B	0.999398	0.793652	0	2.9133	1.85035	#N/A	0.377305	-3.50807	4	1	1		1	0	3	0.408221	1	1		0	1	3
hCG_2005638	0	0	0	2.9133	1.85035	#N/A	0.377305	-3.50807	4	1	1		1	0	3	0.408221	1	1		0	1	3
BAT1	0	0	0	2.9133	1.85035	#N/A	0.377305	-3.50807	4	1	1		1	0	3	0.408221	1	1		0	1	3
DKFZp547B159	0	0	0	2.9133	1.85035	#N/A	0.377305	-3.50807	4	1	1		1	0	3	0.408221	1	1		0	1	3
DDX39	0	0	0	2.9133	1.85035	#N/A	0.377305	-3.50807	4	1	1		1	0	3	0.408221	1	1		0	1	3
CXCL5	1.00089	0.722093	0	3.35578	1.50743	#N/A	0.598193	-4.49677	4	1	1		1	0	3	0.241159	1	1		0	1	3
CPA4	1.00772	0.0784867	0	1.55805	1.64695	#N/A	0.70413	-3.50702	4	1	1		1	0	3	0.100526	1	1		0	1	3
APOE	1.00016	0.327127	0	8.49148	#N/A	-1.88115	-0.19252	1.00599	4	1		0	0	1	2	1.85595	1		1	0	1	3
RPS28	1.00008	0.263312	0	3.9143	2.51132	#N/A	-0.389179	-3.41582	4	1	1		0	0	2	0.655156	1	1		0	1	3
HNRNPA1	0.999894	0.810404	0	1.74909	1.31682	#N/A	-0.0472755	-2.52042	4	1	1		0	0	2	0.124553	1	1		0	1	3
HNRNPA1L2	0.995497	0.91817	0	1.74909	1.31682	#N/A	-0.0472755	-2.52042	4	1	1		0	0	2	0.124553	1	1		0	1	3
hCG_2020860	0	0	0	1.74909	1.31682	#N/A	-0.0472755	-2.52042	4	1	1		0	0	2	0.124553	1	1		0	1	3
HNRPA1	0	0	0	1.74909	1.31682	#N/A	-0.0472755	-2.52042	4	1	1		0	0	2	0.124553	1	1		0	1	3
RP11-78J21.1	0	0	0	1.74909	1.31682	#N/A	-0.0472755	-2.52042	4	1	1		0	0	2	0.124553	1	1		0	1	3
GSTP1	1.00007	0.629876	0	2.37126	1.45376	#N/A	-0.261093	-3.48165	4	1	1		0	0	2	0.0205719	1	1		0	1	3
PPA1	0.99863	0.168012	0	1.67792	1.02127	#N/A	-0.149505	-2.62647	4	1	1		0	0	2	-0.019196	1	1		0	1	3
HEL-S-66p	0	0	0	1.67792	1.02127	#N/A	-0.149505	-2.62647	4	1	1		0	0	2	-0.019196	1	1		0	1	3
EEF1B2	0.999869	0.500009	0	1.62262	1.11948	#N/A	-0.0985995	-3.56179	4	1	1		0	0	2	-0.229574	1	1		0	1	3
LOC392793	0	0	0	1.62262	1.11948	#N/A	-0.0985995	-3.56179	4	1	1		0	0	2	-0.229574	1	1		0	1	3
STIP1	0.999878	0.926441	0	1.68849	1.52538	#N/A	-0.434525	-3.81345	4	1	1		0	0	2	-0.258527	1	1		0	1	3
HEL-S-94n	0	0	0	1.68849	1.52538	#N/A	-0.434525	-3.81345	4	1	1		0	0	2	-0.258527	1	1		0	1	3
C1S	0.999489	0.512241	0	5.77209	#N/A	-1.1251	-2.02728	-0.0752686	4	1		0	0	0	1	0.636109	1		1	1	0	3
LGALS3	0	0	0	-0.495993	-1.18297	-1.32633	#N/A	1.87782	4	0	0	0		1	1	-0.281866	0	1	1		1	3
hCG_22119	0	0	0	-0.495993	-1.18297	-1.32633	#N/A	1.87782	4	0	0	0		1	1	-0.281866	0	1	1		1	3
TFPI2	1.00066	0.170561	0	-1.07497	-1.36893	1.14514	#N/A	-0.754991	4	0	0	1		0	1	-0.513439	1	1	1		0	3
ITGA3	0	0	0	-0.956975	-1.77769	1.0306	#N/A	-1.09667	4	0	0	1		0	1	-0.700186	0	1	1		1	3
CALU	1.00041	0.654382	0	-1.74549	-1.85014	-1.6634	0.230831	#N/A	4	0	0	0	1		1	-1.25705	1	1	1	0		3
CXCL8	0.998842	0.419198	0	-3.24259	-3.68677	#N/A	0.638499	-2.298	4	0	0		1	0	1	-2.14722	1	1		0	1	3
IL8	0	0	0	-3.24259	-3.68677	#N/A	0.638499	-2.298	4	0	0		1	0	1	-2.14722	1	1		0	1	3
KPNB1	0.997593	0.216935	0	-1.27792	-1.84028	#N/A	-0.137605	-1.5887	4	0	0		0	0	0	-1.21112	1	1		0	1	3
ADAMTS1	1.00077	0.560635	0	-1.30481	-1.98469	#N/A	-0.395391	-2.45852	4	0	0		0	0	0	-1.53585	1	1		0	1	3
DKFZp686E01144	0	0	0	-1.30481	-1.98469	#N/A	-0.395391	-2.45852	4	0	0		0	0	0	-1.53585	1	1		0	1	3
LRRC59	0	0	0	-0.516696	-2.35084	#N/A	-1.04505	-2.56298	4	0	0		0	0	0	-1.61889	0	1		1	1	3
OR2A25	0.56304	0.723773	0	5.8047	4.50535	#N/A	-0.550686	0.0655712	4	1	1		0	1	3	2.45623	1	1		0	0	2
THBS4	1.00365	0.195857	0	3.94804	4.6252	#N/A	0.831236	-0.109969	4	1	1		1	0	3	2.32363	1	1		0	0	2
CLEC11A	1.00018	0.723135	0	3.99941	3.22564	#N/A	0.0681897	-0.872078	4	1	1		1	0	3	1.60529	1	1		0	0	2
FBN3	1.001	0.775458	0	2.68225	1.40748	0.116912	#N/A	-0.0739123	4	1	1	1		0	3	1.03318	1	1	0		0	2
SEMA7A	0	0	0	0.611814	1.00767	#N/A	0.762203	-1.15224	4	1	1		1	0	3	0.307363	0	1		0	1	2
APOB	1.11662	0.700537	0	5.23783	#N/A	7.88	-0.0109205	-0.184812	4	1		1	0	0	2	3.23053	1		1	0	0	2
LTBP3	1.00046	0.735742	0	1.43532	1.43357	-0.0141889	#N/A	-0.223228	4	1	1	0		0	2	0.657868	1	1	0		0	2
COL18A1	1.0001	0.887645	0	3.06196	#N/A	-1.16403	-0.706276	0.525216	4	1		0	0	1	2	0.429218	1		1	0	0	2
HNRNPA2B1	0.998646	0.154946	0	1.74004	0.815342	#N/A	-0.326729	-4.32726	4	1	1		0	0	2	-0.524653	1	0		0	1	2
HNRPA2B1	0	0	0	1.74004	0.815342	#N/A	-0.326729	-4.32726	4	1	1		0	0	2	-0.524653	1	0		0	1	2
UCHL1	1.00002	0.945645	0	1.2102	-0.0329534	#N/A	0.00497574	-3.76362	4	1	0		1	0	2	-0.645351	1	0		0	1	2
HEL-117	0	0	0	1.2102	-0.0329534	#N/A	0.00497574	-3.76362	4	1	0		1	0	2	-0.645351	1	0		0	1	2
SVEP1	1.0291	0.111605	0	6.23505	#N/A	-0.244074	-1.62361	-0.723962	4	1		0	0	0	1	0.910852	1		0	1	0	2
TNXB	1.01021	0.325724	0	1.29355	#N/A	-0.560657	-1.01386	-0.0624007	4	1		0	0	0	1	-0.0858433	1		0	1	0	2
PFKP	0	0	0	-0.485384	-2.00031	2.45543	#N/A	-0.606676	4	0	0	1		0	1	-0.159236	0	1	1		0	2
NUDC	0	0	0	-0.201017	1.86816	#N/A	-0.430509	-3.67198	4	0	1		0	0	1	-0.608835	0	1		0	1	2
NPD011	0	0	0	-0.201017	1.86816	#N/A	-0.430509	-3.67198	4	0	1		0	0	1	-0.608835	0	1		0	1	2
FKBP1A	1.00001	0.974124	0	-1.0238	-1.50168	-0.377838	0.183573	#N/A	4	0	0	0	1		1	-0.679937	1	1	0	0		2
FKBP12-Exip2	0	0	0	-1.0238	-1.50168	-0.377838	0.183573	#N/A	4	0	0	0	1		1	-0.679937	1	1	0	0		2
AHSA1	0	0	0	-0.715792	-1.1279	#N/A	0.209211	-1.97829	4	0	0		1	0	1	-0.903193	0	1		0	1	2
P4HB	0.999495	0.202582	0	-1.52445	-2.24272	-0.980775	#N/A	0.897586	4	0	0	0		1	1	-0.96259	1	1	0		0	2
ALCAM	1.00089	0.678394	0	-2.01843	-1.78332	-0.684681	0.470088	#N/A	4	0	0	0	1		1	-1.00409	1	1	0	0		2
PRDX3	1.0001	0.914829	0	-2.03068	-2.1911	-0.746201	0.736008	#N/A	4	0	0	0	1		1	-1.05799	1	1	0	0		2
PAICS	1.00111	0.671132	0	-1.7985	-2.7232	-0.118535	#N/A	0.309356	4	0	0	0		1	1	-1.08272	1	1	0		0	2
CALR	1.00003	0.839915	0	-1.4744	-2.13941	-0.962862	#N/A	0.245202	4	0	0	0		1	1	-1.08287	1	1	0		0	2
HEL-S-99n	0	0	0	-1.4744	-2.13941	-0.962862	#N/A	0.245202	4	0	0	0		1	1	-1.08287	1	1	0		0	2
GNAI2	0.999836	0.877078	0	-1.61372	-2.44055	0.0667048	#N/A	-0.528545	4	0	0	1		0	1	-1.12903	1	1	0		0	2
GNAI1	0.995946	0.644029	0	-1.61372	-2.44055	0.0667048	#N/A	-0.528545	4	0	0	1		0	1	-1.12903	1	1	0		0	2
GNAI3	0.979432	0.197259	0	-1.61372	-2.44055	0.0667048	#N/A	-0.528545	4	0	0	1		0	1	-1.12903	1	1	0		0	2
WUGSC:H_LUCA16.1	0	0	0	-1.61372	-2.44055	0.0667048	#N/A	-0.528545	4	0	0	1		0	1	-1.12903	1	1	0		0	2
NT5E	1.00527	0.057697	0	-1.85577	-2.71232	-0.384777	#N/A	0.240986	4	0	0	0		1	1	-1.17797	1	1	0		0	2
PCMT1	0	0	0	-0.375702	-1.50264	-0.177816	#N/A	-1.12878	4	0	0	0		0	0	-0.796236	0	1	0		1	2
ARCN1	0.999181	0.377986	0	-1.17674	-1.47333	-0.394836	#N/A	-0.694429	4	0	0	0		0	0	-0.934834	1	1	0		0	2
DKFZp686M09245	0	0	0	-1.17674	-1.47333	-0.394836	#N/A	-0.694429	4	0	0	0		0	0	-0.934834	1	1	0		0	2
PSMA8	1.1497	0.753985	0	-1.40457	-2.16077	-0.212568	#N/A	-0.507994	4	0	0	0		0	0	-1.07148	1	1	0		0	2
PSMA7	1.00012	0.808869	0	-1.40457	-2.16077	-0.212568	#N/A	-0.507994	4	0	0	0		0	0	-1.07148	1	1	0		0	2
PSMA3	1.00047	0.88202	0	-1.67028	-2.164	-0.143626	#N/A	-0.46168	4	0	0	0		0	0	-1.1099	1	1	0		0	2
DDB1	0.997387	0.272986	0	-1.2723	-2.25382	-0.516508	#N/A	-0.766315	4	0	0	0		0	0	-1.20224	1	1	0		0	2
PRDX4	0.999783	0.784853	0	-1.04978	-2.04519	-0.791444	#N/A	-0.994476	4	0	0	0		0	0	-1.22022	1	1	0		0	2
HEL-S-97n	0	0	0	-1.04978	-2.04519	-0.791444	#N/A	-0.994476	4	0	0	0		0	0	-1.22022	1	1	0		0	2
HEL-S-45	0	0	0	-0.980044	-2.54439	#N/A	-0.67122	-1.39516	4	0	0		0	0	0	-1.3977	0	1		0	1	2
TGM2	0	0	0	-0.980044	-2.54439	#N/A	-0.67122	-1.39516	4	0	0		0	0	0	-1.3977	0	1		0	1	2
CACYBP	0	0	0	-0.738279	-1.68138	#N/A	-0.343526	-2.87028	4	0	0		0	0	0	-1.40837	0	1		0	1	2
THBS2	0	0	0	#N/A	3.37427	-0.646425	0.425364	0.813362	4		1	0	1	1	3	0.991642		1	0	0	0	1
DST	0	0	0	0.783079	0.202144	#N/A	1.17794	-0.560196	4	1	1		1	0	3	0.400742	0	0		1	0	1
UBE1	0	0	0	0.696499	0.349234	#N/A	0.175836	-1.42005	4	1	1		1	0	3	-0.0496197	0	0		0	1	1
UBA1	0	0	0	0.696499	0.349234	#N/A	0.175836	-1.42005	4	1	1		1	0	3	-0.0496197	0	0		0	1	1
RPS12	0	0	0	0.59066	0.323838	#N/A	0.231626	-1.53191	4	1	1		1	0	3	-0.0964464	0	0		0	1	1
CTSA	0.999683	0.804106	0	1.25071	0.990249	-0.440881	-0.00468184	#N/A	4	1	1	0	0		2	0.448848	1	0	0	0		1
PPGB	0	0	0	1.25071	0.990249	-0.440881	-0.00468184	#N/A	4	1	1	0	0		2	0.448848	1	0	0	0		1
TFPI	0	0	0	-0.449675	0.886236	#N/A	0.386362	-1.90665	4	0	1		1	0	2	-0.270933	0	0		0	1	1
HEL-S-52	0	0	0	0.416901	0.134785	#N/A	-0.135318	-2.02138	4	1	1		0	0	2	-0.401253	0	0		0	1	1
WDR1	0	0	0	0.416901	0.134785	#N/A	-0.135318	-2.02138	4	1	1		0	0	2	-0.401253	0	0		0	1	1
ILF2	0	0	0	0.955706	0.137729	#N/A	-0.358054	-2.90734	4	1	1		0	0	2	-0.542988	0	0		0	1	1
RNASET2	0	0	0	-0.0390455	0.364601	#N/A	0.887945	-3.54212	4	0	1		1	0	2	-0.582156	0	0		0	1	1
RNASE6PL	0	0	0	-0.0390455	0.364601	#N/A	0.887945	-3.54212	4	0	1		1	0	2	-0.582156	0	0		0	1	1
NPEPPS	0	0	0	-0.336536	-1.15113	0.225339	-0.0556033	#N/A	4	0	0	1	0		1	-0.329482	0	1	0	0		1
GDI1	0	0	0	-0.991215	-1.08244	-0.166357	0.0989585	#N/A	4	0	0	0	1		1	-0.535263	0	1	0	0		1
MYL6	0	0	0	0.204563	-0.721933	#N/A	-0.128906	-1.70472	4	1	0		0	0	1	-0.587748	0	0		0	1	1
GGH	0	0	0	-0.656105	-0.98349	#N/A	0.244353	-2.36189	4	0	0		1	0	1	-0.939283	0	0		0	1	1
LTA4H	0	0	0	-0.572155	-1.30916	-0.850839	-0.0920387	#N/A	4	0	0	0	0		0	-0.706048	0	1	0	0		1
TXN	0	0	0	-0.312937	-0.930404	-0.240828	#N/A	-1.45044	4	0	0	0		0	0	-0.733653	0	0	0		1	1
NUDT5	0	0	0	-0.715536	-1.9061	-0.427595	-0.39852	#N/A	4	0	0	0	0		0	-0.861938	0	1	0	0		1
CCT8	0	0	0	-0.748255	-0.705147	#N/A	-0.110342	-2.69078	4	0	0		0	0	0	-1.06363	0	0		0	1	1
PLS3	0	0	0	-0.633474	-0.99194	-0.864477	#N/A	-2.31401	4	0	0	0		0	0	-1.20098	0	0	0		1	1
ALYREF	0.999275	0.512912	0	2.52189	1.99244	#N/A	#N/A	-2.67745	3	1	1			0	2	0.612294	1	1			1	3
HACD3	0	0	0	-1.49995	-2.22282	-1.4885	#N/A	#N/A	3	0	0	0			0	-1.73709	1	1	1			3
ANXA6	1.00127	0.602942	0	-2.28028	-3.92822	-1.11257	#N/A	#N/A	3	0	0	0			0	-2.44035	1	1	1			3
SERPINB2	1.00323	0.473977	0	1.88957	1.31395	#N/A	0.0345874	#N/A	3	1	1		1		3	1.07937	1	1		0		2
SERPINB10	0.869063	0.732838	0	1.88957	1.31395	#N/A	0.0345874	#N/A	3	1	1		1		3	1.07937	1	1		0		2
DFFA	1.0044	0.282555	0	2.3976	1.57394	#N/A	-0.164085	#N/A	3	1	1		0		2	1.26915	1	1		0		2
PEA15	0.999723	0.214891	0	1.82021	1.01813	#N/A	-0.138103	#N/A	3	1	1		0		2	0.90008	1	1		0		2
MATR3	1.05058	0.380164	0	1.63704	1.20555	#N/A	-0.256679	#N/A	3	1	1		0		2	0.86197	1	1		0		2
DKFZp686K0542	0	0	0	1.63704	1.20555	#N/A	-0.256679	#N/A	3	1	1		0		2	0.86197	1	1		0		2
DKFZp686K23100	0	0	0	1.63704	1.20555	#N/A	-0.256679	#N/A	3	1	1		0		2	0.86197	1	1		0		2
DKFZp686L22104	0	0	0	1.63704	1.20555	#N/A	-0.256679	#N/A	3	1	1		0		2	0.86197	1	1		0		2
RBMX	1.00107	0.518698	0	3.32081	#N/A	#N/A	-0.300926	-2.96934	3	1			0	0	1	0.0168503	1			0	1	2
RBMXL1	0.993452	0.293929	0	3.32081	#N/A	#N/A	-0.300926	-2.96934	3	1			0	0	1	0.0168503	1			0	1	2
SERPINB7	0.995058	0.378406	0	-1.4657	-0.195412	#N/A	1.29007	#N/A	3	0	0		1		1	-0.123682	1	0		1		2
UAP1	0.99888	0.822228	0	2.12651	#N/A	#N/A	-0.10798	-3.54851	3	1			0	0	1	-0.509992	1			0	1	2
SOD2	1.00195	0.354141	0	-1.16236	-1.59508	0.383342	#N/A	#N/A	3	0	0	1			1	-0.791365	1	1	0			2
DKFZp564M2422	0	0	0	-1.16236	-1.59508	0.383342	#N/A	#N/A	3	0	0	1			1	-0.791365	1	1	0			2
ACLY	0.999678	0.878528	0	-1.38606	-1.46746	0.408612	#N/A	#N/A	3	0	0	1			1	-0.814968	1	1	0			2
ACLY variant protein	0	0	0	-1.38606	-1.46746	0.408612	#N/A	#N/A	3	0	0	1			1	-0.814968	1	1	0			2
APOA1BP	1.00022	0.743205	0	-1.12048	-1.79765	#N/A	0.0632279	#N/A	3	0	0		1		1	-0.951632	1	1		0		2
HSPA1A	1.00042	0.578109	0	-1.18665	-1.69815	#N/A	0.0226311	#N/A	3	0	0		1		1	-0.954055	1	1		0		2
HSPA1B	0.999585	0.673586	0	-1.18665	-1.69815	#N/A	0.0226311	#N/A	3	0	0		1		1	-0.954055	1	1		0		2
HEL-S-103	0	0	0	-1.18665	-1.69815	#N/A	0.0226311	#N/A	3	0	0		1		1	-0.954055	1	1		0		2
PDIA4	0.999194	0.0566968	0	-1.75101	-2.40665	0.0187766	#N/A	#N/A	3	0	0	1			1	-1.37963	1	1	0			2
ERP70	0	0	0	-1.75101	-2.40665	0.0187766	#N/A	#N/A	3	0	0	1			1	-1.37963	1	1	0			2
DCBLD2	0.996672	0.508382	0	-2.63335	-1.94824	0.0166624	#N/A	#N/A	3	0	0	1			1	-1.52164	1	1	0			2
COPB2	0.99802	0.39023	0	-1.70962	-3.07396	0.0899087	#N/A	#N/A	3	0	0	1			1	-1.56456	1	1	0			2
EFHD2	1.00079	0.471189	0	-1.1657	-1.64992	#N/A	-0.468112	#N/A	3	0	0		0		0	-1.09458	1	1		0		2
GNB2	0.999704	0.643189	0	-1.2869	-1.87465	-0.133426	#N/A	#N/A	3	0	0	0			0	-1.09833	1	1	0			2
CDC42	0.999999	0.99914	0	-1.58534	-1.41438	#N/A	-0.322325	#N/A	3	0	0		0		0	-1.10735	1	1		0		2
hCG_39634	0	0	0	-1.58534	-1.41438	#N/A	-0.322325	#N/A	3	0	0		0		0	-1.10735	1	1		0		2
ARHGDIA	0.999738	0.659517	0	-1.0428	-1.33481	-0.96421	#N/A	#N/A	3	0	0	0			0	-1.11394	1	1	0			2
HEL-S-47e	0	0	0	-1.0428	-1.33481	-0.96421	#N/A	#N/A	3	0	0	0			0	-1.11394	1	1	0			2
FKBP2	1.00077	0.420863	0	-1.27401	-2.00487	-0.109577	#N/A	#N/A	3	0	0	0			0	-1.12948	1	1	0			2
SUGT1	1.0389	0.0631558	0	-1.18067	-2.1515	-0.12235	#N/A	#N/A	3	0	0	0			0	-1.15151	1	1	0			2
FDPS	0.998285	0.367629	0	-1.32782	-1.63587	#N/A	-0.617277	#N/A	3	0	0		0		0	-1.19366	1	1		0		2
COPE	1.00042	0.532145	0	-1.15719	-1.94831	-0.719056	#N/A	#N/A	3	0	0	0			0	-1.27485	1	1	0			2
PSMB3	0.999945	0.872403	0	-1.38617	-1.81551	-0.68886	#N/A	#N/A	3	0	0	0			0	-1.29685	1	1	0			2
TSN	0.996092	0.164921	0	-1.19861	-2.08723	-0.698323	#N/A	#N/A	3	0	0	0			0	-1.32805	1	1	0			2
UGP2	0.999875	0.982764	0	-1.32053	-1.98364	-0.868897	#N/A	#N/A	3	0	0	0			0	-1.39102	1	1	0			2
TWF2	0.999773	0.908802	0	-1.43652	-2.03105	#N/A	#N/A	-0.942996	3	0	0			0	0	-1.47019	1	1			0	2
PSMB5	0.999628	0.574465	0	-1.92818	-2.37364	-0.474501	#N/A	#N/A	3	0	0	0			0	-1.59211	1	1	0			2
CPNE3	1.00422	0.0790594	0	-2.69157	-4.0253	-0.719561	#N/A	#N/A	3	0	0	0			0	-2.47881	1	1	0			2
MYOF	0.999088	0.520671	0	-2.96592	-4.27305	-0.359414	#N/A	#N/A	3	0	0	0			0	-2.5328	1	1	0			2
HIST1H3A	1.00356	0.838702	0	-4.18347	-4.19189	-0.885446	#N/A	#N/A	3	0	0	0			0	-3.08694	1	1	0			2
STC1	0	0	0	#N/A	#N/A	2.95832	0.380064	0.882823	3			1	1	1	3	1.40707			1	0	0	1
COL5A1	0	0	0	#N/A	#N/A	0.113627	0.610381	1.82511	3			1	1	1	3	0.849705			0	0	1	1
IGFBP7	0	0	0	#N/A	#N/A	-0.803786	0.955945	5.54224	3			0	1	1	2	1.89813			0	0	1	1
HDGF	0.999917	0.823998	0	3.63465	0.943775	#N/A	-0.0852783	#N/A	3	1	1		0		2	1.49771	1	0		0		1
UBE2N	0.997644	0.433673	0	2.19861	0.609618	#N/A	-0.0948896	#N/A	3	1	1		0		2	0.904445	1	0		0		1
HEL-S-71	0	0	0	2.19861	0.609618	#N/A	-0.0948896	#N/A	3	1	1		0		2	0.904445	1	0		0		1
TIE	0	0	0	-0.265813	2.01634	#N/A	0.905585	#N/A	3	0	1		1		2	0.885371	0	1		0		1
TIE1	0	0	0	-0.265813	2.01634	#N/A	0.905585	#N/A	3	0	1		1		2	0.885371	0	1		0		1
ITGBL1	1.00454	0.865825	0	2.47005	#N/A	0.191143	#N/A	-0.213734	3	1		1		0	2	0.81582	1		0		0	1
ARPC4-TTLL3	0	0	0	1.57189	0.271724	#N/A	#N/A	-0.881135	3	1	1			0	2	0.320825	1	0			0	1
RAP1A	0	0	0	-0.187255	#N/A	1.38983	#N/A	-0.386385	3	0		1		0	1	0.272064	0		1		0	1
RAP1B	0	0	0	-0.187255	#N/A	1.38983	#N/A	-0.386385	3	0		1		0	1	0.272064	0		1		0	1
DKK1	0	0	0	-0.556641	-0.961536	#N/A	1.15212	#N/A	3	0	0		1		1	-0.122018	0	0		1		1
CTSC	0.997849	0.510649	0	-1.08854	-0.77511	#N/A	0.852239	#N/A	3	0	0		1		1	-0.337137	1	0		0		1
FBLN2	0	0	0	#N/A	#N/A	-1.92539	-0.437176	0.833582	3			0	0	1	1	-0.509662			1	0	0	1
DKFZp586A1519	0	0	0	#N/A	#N/A	-1.92539	-0.437176	0.833582	3			0	0	1	1	-0.509662			1	0	0	1
PSMB4	0	0	0	-0.72884	-1.72674	0.52042	#N/A	#N/A	3	0	0	1			1	-0.645052	0	1	0			1
BASP1	0	0	0	-0.441627	#N/A	0.477224	#N/A	-2.435	3	0		1		0	1	-0.7998	0		0		1	1
HNRNPC	0	0	0	0.613171	-0.442991	#N/A	#N/A	-3.22768	3	1	0			0	1	-1.01917	0	0			1	1
hCG_1641229	0	0	0	0.613171	-0.442991	#N/A	#N/A	-3.22768	3	1	0			0	1	-1.01917	0	0			1	1
HNRPC	0	0	0	0.613171	-0.442991	#N/A	#N/A	-3.22768	3	1	0			0	1	-1.01917	0	0			1	1
RPRD1B	0	0	0	-0.61397	-1.01777	#N/A	-0.0254341	#N/A	3	0	0		0		0	-0.552391	0	1		0		1
CSE1L	0	0	0	-0.564406	-1.68766	#N/A	-0.0963139	#N/A	3	0	0		0		0	-0.782794	0	1		0		1
DKFZp686E12166	0	0	0	-0.560179	-0.74221	#N/A	#N/A	-1.54469	3	0	0			0	0	-0.949027	0	0			1	1
GNS	0	0	0	-0.560179	-0.74221	#N/A	#N/A	-1.54469	3	0	0			0	0	-0.949027	0	0			1	1
IGFBP1	0	0	0	#N/A	#N/A	5.30064	#N/A	6.35528	2			1		1	2	5.82796			1		1	2
IL6	0	0	0	#N/A	#N/A	4.96521	#N/A	4.45154	2			1		1	2	4.70837			1		1	2
PRG4	0	0	0	#N/A	#N/A	1.00989	#N/A	4.36606	2			1		1	2	2.68798			1		1	2
SCUBE3	0	0	0	#N/A	#N/A	1.57519	#N/A	1.6559	2			1		1	2	1.61555			1		1	2
ABI3BP	0	0	0	#N/A	1.56931	#N/A	1.17279	#N/A	2		1		1		2	1.37105		1		1		2
ANP32B	0.999469	0.448394	0	1.38567	1.31707	#N/A	#N/A	#N/A	2	1	1				2	1.35137	1	1				2
DF	0	0	0	#N/A	#N/A	-3.02246	#N/A	4.28853	2			0		1	1	0.633032			1		1	2
CFD	0	0	0	#N/A	#N/A	-3.02246	#N/A	4.28853	2			0		1	1	0.633032			1		1	2
S100A6	0	0	0	#N/A	#N/A	-1.10429	#N/A	2.32533	2			0		1	1	0.610519			1		1	2
IGFBP2	0	0	0	#N/A	#N/A	-1.54308	#N/A	2.42722	2			0		1	1	0.442068			1		1	2
C7	0	0	0	#N/A	#N/A	-1.94827	#N/A	1.04977	2			0		1	1	-0.449251			1		1	2
ERO1L	0.99996	0.991779	0	-1.09043	-1.23704	#N/A	#N/A	#N/A	2	0	0				0	-1.16374	1	1				2
EIF4G1	0.999936	0.932738	0	-1.16411	-1.47959	#N/A	#N/A	#N/A	2	0	0				0	-1.32185	1	1				2
EIF4G1 variant protein	0	0	0	-1.16411	-1.47959	#N/A	#N/A	#N/A	2	0	0				0	-1.32185	1	1				2
PPP3CA	1.00868	0.0768364	0	-1.18277	-1.51173	#N/A	#N/A	#N/A	2	0	0				0	-1.34725	1	1				2
PPP3CB	1.00115	0.849042	0	-1.18277	-1.51173	#N/A	#N/A	#N/A	2	0	0				0	-1.34725	1	1				2
PPP3CC	1.00046	0.982171	0	-1.18277	-1.51173	#N/A	#N/A	#N/A	2	0	0				0	-1.34725	1	1				2
IPO7	0.998666	0.62128	0	-1.17747	-1.51924	#N/A	#N/A	#N/A	2	0	0				0	-1.34835	1	1				2
RPS13	1.0003	0.128023	0	-1.2045	-1.53973	#N/A	#N/A	#N/A	2	0	0				0	-1.37211	1	1				2
PEPD	1.00078	0.564955	0	-1.27095	-1.49444	#N/A	#N/A	#N/A	2	0	0				0	-1.3827	1	1				2
CRIM1	1.00116	0.772078	0	-1.55732	-1.22558	#N/A	#N/A	#N/A	2	0	0				0	-1.39145	1	1				2
SNAP91	1.06742	0.587505	0	-1.07305	-1.74839	#N/A	#N/A	#N/A	2	0	0				0	-1.41072	1	1				2
PICALM	1.00135	0.520702	0	-1.07305	-1.74839	#N/A	#N/A	#N/A	2	0	0				0	-1.41072	1	1				2
LIPA	0.998283	0.558264	0	-1.23077	-1.67199	#N/A	#N/A	#N/A	2	0	0				0	-1.45138	1	1				2
CDC37	0.999419	0.460876	0	-1.31239	-1.60617	#N/A	#N/A	#N/A	2	0	0				0	-1.45928	1	1				2
MBD5	0.995453	0.883869	0	-1.31239	-1.60617	#N/A	#N/A	#N/A	2	0	0				0	-1.45928	1	1				2
BCAT1	0.99971	0.527228	0	-1.39745	-1.5924	#N/A	#N/A	#N/A	2	0	0				0	-1.49493	1	1				2
GNPDA1	0.998636	0.70626	0	-1.19279	-1.80239	#N/A	#N/A	#N/A	2	0	0				0	-1.49759	1	1				2
DLD	1.00168	0.71244	0	-1.2684	-1.76475	#N/A	#N/A	#N/A	2	0	0				0	-1.51657	1	1				2
GSS	0.999953	0.979097	0	-1.1108	-1.95746	#N/A	#N/A	#N/A	2	0	0				0	-1.53413	1	1				2
HEL-S-64p	0	0	0	-1.1108	-1.95746	#N/A	#N/A	#N/A	2	0	0				0	-1.53413	1	1				2
SNRNP200	1.00001	0.99406	0	-1.58862	-1.58421	#N/A	#N/A	#N/A	2	0	0				0	-1.58642	1	1				2
RUVBL1	1.00044	0.924939	0	-1.29808	-1.92678	#N/A	#N/A	#N/A	2	0	0				0	-1.61243	1	1				2
ITGA2	1.02125	0.362289	0	-1.23355	-2.0077	#N/A	#N/A	#N/A	2	0	0				0	-1.62062	1	1				2
NDUFAB1	1.00101	0.424774	0	-1.73083	-1.59097	#N/A	#N/A	#N/A	2	0	0				0	-1.6609	1	1				2
CNN3	1.00078	0.28449	0	-1.64031	-1.69795	#N/A	#N/A	#N/A	2	0	0				0	-1.66913	1	1				2
SNRPE	1.00136	0.122488	0	-1.0651	-2.3357	#N/A	#N/A	#N/A	2	0	0				0	-1.7004	1	1				2
GANAB	0.999746	0.613077	0	-1.73435	-1.70479	#N/A	#N/A	#N/A	2	0	0				0	-1.71957	1	1				2
HEL-S-164nA	0	0	0	-1.73435	-1.70479	#N/A	#N/A	#N/A	2	0	0				0	-1.71957	1	1				2
HK1	0.997713	0.480272	0	-1.37138	-2.23454	#N/A	#N/A	#N/A	2	0	0				0	-1.80296	1	1				2
CANX	0.999686	0.504522	0	-2.44734	#N/A	-1.20105	#N/A	#N/A	2	0		0			0	-1.82419	1		1			2
CNPY2	0.99481	0.299211	0	-1.70921	-1.96788	#N/A	#N/A	#N/A	2	0	0				0	-1.83854	1	1				2
PSMD6	0.986793	0.166394	0	-1.61598	-2.18294	#N/A	#N/A	#N/A	2	0	0				0	-1.89946	1	1				2
UGGT1	0.992942	0.344402	0	-1.52081	-2.32171	#N/A	#N/A	#N/A	2	0	0				0	-1.92126	1	1				2
NRP2	0.997511	0.432781	0	-1.80561	-2.06697	#N/A	#N/A	#N/A	2	0	0				0	-1.93629	1	1				2
DKFZp686J1169	0	0	0	-1.80561	-2.06697	#N/A	#N/A	#N/A	2	0	0				0	-1.93629	1	1				2
LDLR	1.00141	0.692518	0	-1.58992	-2.31043	#N/A	#N/A	#N/A	2	0	0				0	-1.95017	1	1				2
SHMT2	0.998944	0.458912	0	-1.56776	-2.33471	#N/A	#N/A	#N/A	2	0	0				0	-1.95124	1	1				2
DKFZp686P09201	0	0	0	-1.56776	-2.33471	#N/A	#N/A	#N/A	2	0	0				0	-1.95124	1	1				2
HEL-S-51e	0	0	0	-1.56776	-2.33471	#N/A	#N/A	#N/A	2	0	0				0	-1.95124	1	1				2
ARF4	0.999587	0.445686	0	-1.45455	-2.46767	#N/A	#N/A	#N/A	2	0	0				0	-1.96111	1	1				2
PSMD13	1.001	0.764347	0	-1.52575	-2.50947	#N/A	#N/A	#N/A	2	0	0				0	-2.01761	1	1				2
COPG1	1.0001	0.93081	0	-1.76123	-2.27486	#N/A	#N/A	#N/A	2	0	0				0	-2.01805	1	1				2
COPG	0	0	0	-1.76123	-2.27486	#N/A	#N/A	#N/A	2	0	0				0	-2.01805	1	1				2
FASN	0.999559	0.626776	0	-1.57971	-2.48921	#N/A	#N/A	#N/A	2	0	0				0	-2.03446	1	1				2
PSMB6	1.00098	0.381359	0	-1.95825	-2.14375	#N/A	#N/A	#N/A	2	0	0				0	-2.051	1	1				2
HEL-S-107	0	0	0	-1.67701	-2.43892	#N/A	#N/A	#N/A	2	0	0				0	-2.05796	1	1				2
RPL17	1.00042	0.49759	0	-1.80762	-2.48949	#N/A	#N/A	#N/A	2	0	0				0	-2.14856	1	1				2
hCG_24487	0	0	0	-1.80762	-2.48949	#N/A	#N/A	#N/A	2	0	0				0	-2.14856	1	1				2
RPL17-C18orf32	0	0	0	-1.80762	-2.48949	#N/A	#N/A	#N/A	2	0	0				0	-2.14856	1	1				2
HEL-S-123m	0	0	0	#N/A	#N/A	-2.02241	#N/A	-2.34015	2			0		0	0	-2.18128			1		1	2
ATP5A1	0	0	0	#N/A	#N/A	-2.02241	#N/A	-2.34015	2			0		0	0	-2.18128			1		1	2
PLAUR	1.00539	0.101744	0	-2.67971	-1.77678	#N/A	#N/A	#N/A	2	0	0				0	-2.22825	1	1				2
FLNB	1.00208	0.428337	0	-1.79572	-2.66167	#N/A	#N/A	#N/A	2	0	0				0	-2.22869	1	1				2
DKFZp686A1668	0	0	0	-1.79572	-2.66167	#N/A	#N/A	#N/A	2	0	0				0	-2.22869	1	1				2
TIA1	1.00175	0.603547	0	-2.00439	-2.4605	#N/A	#N/A	#N/A	2	0	0				0	-2.23245	1	1				2
TIAL1	0.998325	0.750901	0	-2.00439	-2.4605	#N/A	#N/A	#N/A	2	0	0				0	-2.23245	1	1				2
RPS16	1.00007	0.15731	0	-1.44064	-3.08849	#N/A	#N/A	#N/A	2	0	0				0	-2.26456	1	1				2
APEH	0.997449	0.267908	0	-2.09244	-2.49575	#N/A	#N/A	#N/A	2	0	0				0	-2.29409	1	1				2
C12orf10	1.00148	0.584664	0	-1.77411	-2.88811	#N/A	#N/A	#N/A	2	0	0				0	-2.33111	1	1				2
MST024	0	0	0	-1.77411	-2.88811	#N/A	#N/A	#N/A	2	0	0				0	-2.33111	1	1				2
RPL14	0.999973	0.948538	0	-2.31907	-2.37034	#N/A	#N/A	#N/A	2	0	0				0	-2.3447	1	1				2
ITGA6	0.998066	0.506519	0	-1.29064	-3.5217	#N/A	#N/A	#N/A	2	0	0				0	-2.40617	1	1				2
RPL7	1.00009	0.493873	0	-2.49644	-2.73053	#N/A	#N/A	#N/A	2	0	0				0	-2.61348	1	1				2
WUGSC:H_RG054D04.1	0	0	0	-2.49644	-2.73053	#N/A	#N/A	#N/A	2	0	0				0	-2.61348	1	1				2
C11orf54	1.00431	0.595615	0	-2.15665	-3.11311	#N/A	#N/A	#N/A	2	0	0				0	-2.63488	1	1				2
RPN2	0.999752	0.507116	0	-2.39541	-2.92622	#N/A	#N/A	#N/A	2	0	0				0	-2.66082	1	1				2
PRKDC	1.0005	0.877682	0	-2.11651	-3.31323	#N/A	#N/A	#N/A	2	0	0				0	-2.71487	1	1				2
SLC25A5	1.00002	0.930245	0	-3.60451	#N/A	-1.90958	#N/A	#N/A	2	0		0			0	-2.75704	1		1			2
SLC25A6	0.999921	0.520179	0	-3.60451	#N/A	-1.90958	#N/A	#N/A	2	0		0			0	-2.75704	1		1			2
SLC25A4	0.99885	0.826236	0	-3.60451	#N/A	-1.90958	#N/A	#N/A	2	0		0			0	-2.75704	1		1			2
MME	1.00439	0.585695	0	-2.61951	-3.15742	#N/A	#N/A	#N/A	2	0	0				0	-2.88846	1	1				2
IMPDH2	0.999958	0.931736	0	-2.37587	-3.53444	#N/A	#N/A	#N/A	2	0	0				0	-2.95515	1	1				2
HIST1H2BA	8.47242	0.08209	0	-3.28962	-3.63175	#N/A	#N/A	#N/A	2	0	0				0	-3.46068	1	1				2
HIST1H2BB	1.01105	0.689849	0	-3.28962	-3.63175	#N/A	#N/A	#N/A	2	0	0				0	-3.46068	1	1				2
HIST2H2BE	0.998607	0.150936	0	-3.28962	-3.63175	#N/A	#N/A	#N/A	2	0	0				0	-3.46068	1	1				2
HIST1H2BJ	0.998175	0.456528	0	-3.28962	-3.63175	#N/A	#N/A	#N/A	2	0	0				0	-3.46068	1	1				2
HIST1H2BO	0.996013	0.597892	0	-3.28962	-3.63175	#N/A	#N/A	#N/A	2	0	0				0	-3.46068	1	1				2
HIST3H2BB	0.984107	0.167854	0	-3.28962	-3.63175	#N/A	#N/A	#N/A	2	0	0				0	-3.46068	1	1				2
IGFBP4	0	0	0	#N/A	#N/A	0.451172	#N/A	5.86583	2			1		1	2	3.1585			0		1	1
LTBP1	0	0	0	#N/A	#N/A	0.326129	#N/A	2.83749	2			1		1	2	1.58181			0		1	1
PA2G4	0	0	0	0.896543	2.02598	#N/A	#N/A	#N/A	2	1	1				2	1.46126	0	1				1
B4GAT1	0.998446	0.664709	0	1.82466	#N/A	#N/A	0.996007	#N/A	2	1			1		2	1.41034	1			0		1
B3GNT6	0.58507	0.407968	0	1.82466	#N/A	#N/A	0.996007	#N/A	2	1			1		2	1.41034	1			0		1
KRT1	0	0	0	#N/A	1.95338	#N/A	0.556675	#N/A	2		1		1		2	1.25503		1		0		1
DARS	0	0	0	0.541439	1.65661	#N/A	#N/A	#N/A	2	1	1				2	1.09903	0	1				1
ACO1	0.99483	0.615811	0	1.88628	#N/A	#N/A	0.0661844	#N/A	2	1			1		2	0.976232	1			0		1
IRP1	0	0	0	1.88628	#N/A	#N/A	0.0661844	#N/A	2	1			1		2	0.976232	1			0		1
HEL60	0	0	0	1.88628	#N/A	#N/A	0.0661844	#N/A	2	1			1		2	0.976232	1			0		1
COL5A2	0	0	0	#N/A	#N/A	0.0646633	#N/A	1.80644	2			1		1	2	0.935554			0		1	1
COL3A1	0	0	0	#N/A	#N/A	-0.971588	#N/A	3.10258	2			0		1	1	1.0655			0		1	1
SPOCK1	0	0	0	#N/A	#N/A	-0.875045	#N/A	2.60878	2			0		1	1	0.866869			0		1	1
VCAN	0	0	0	#N/A	#N/A	-0.59735	#N/A	2.29931	2			0		1	1	0.850978			0		1	1
CSPG2	0	0	0	#N/A	#N/A	-0.59735	#N/A	2.29931	2			0		1	1	0.850978			0		1	1
EMILIN1	0	0	0	#N/A	#N/A	-0.811041	#N/A	1.88471	2			0		1	1	0.536836			0		1	1
SRPX2	0	0	0	#N/A	1.82123	-0.812899	#N/A	#N/A	2		1	0			1	0.504165		1	0			1
TPD52L2	0	0	0	0.422095	-1.0978	#N/A	#N/A	#N/A	2	1	0				1	-0.337854	0	1				1
DKFZp686A1765	0	0	0	0.422095	-1.0978	#N/A	#N/A	#N/A	2	1	0				1	-0.337854	0	1				1
CXCL1	0	0	0	#N/A	#N/A	#N/A	0.372667	-1.16545	2				1	0	1	-0.396393				0	1	1
PPP2R4	0	0	0	-0.370772	-1.01645	#N/A	#N/A	#N/A	2	0	0				0	-0.693613	0	1				1
PCBP2	0	0	0	-0.292189	-1.11117	#N/A	#N/A	#N/A	2	0	0				0	-0.701678	0	1				1
PARP1	0	0	0	-0.395665	-1.09678	#N/A	#N/A	#N/A	2	0	0				0	-0.746222	0	1				1
EHD4	1.00317	0.59298	0	-1.16702	#N/A	-0.519507	#N/A	#N/A	2	0		0			0	-0.843263	1		0			1
EHD1	1.00249	0.599044	0	-1.16702	#N/A	-0.519507	#N/A	#N/A	2	0		0			0	-0.843263	1		0			1
EHD3	0.998134	0.790283	0	-1.16702	#N/A	-0.519507	#N/A	#N/A	2	0		0			0	-0.843263	1		0			1
HSPH1	0	0	0	-0.618882	-1.11022	#N/A	#N/A	#N/A	2	0	0				0	-0.864549	0	1				1
HARS	1.00081	0.939699	0	-1.52155	#N/A	-0.237805	#N/A	#N/A	2	0		0			0	-0.879677	1		0			1
HRS	0	0	0	-1.52155	#N/A	-0.237805	#N/A	#N/A	2	0		0			0	-0.879677	1		0			1
CAPNS1	0	0	0	-0.403753	-1.41012	#N/A	#N/A	#N/A	2	0	0				0	-0.906937	0	1				1
CAPNS2	0	0	0	-0.403753	-1.41012	#N/A	#N/A	#N/A	2	0	0				0	-0.906937	0	1				1
CTTN	0	0	0	-0.696417	-1.16761	#N/A	#N/A	#N/A	2	0	0				0	-0.932014	0	1				1
RRAS	0.999975	0.955427	0	-1.58877	#N/A	-0.413284	#N/A	#N/A	2	0		0			0	-1.00103	1		0			1
RRAS2	0.998031	0.745528	0	-1.58877	#N/A	-0.413284	#N/A	#N/A	2	0		0			0	-1.00103	1		0			1
BCHE	1.02848	0.0672186	0	-1.31852	-0.927399	#N/A	#N/A	#N/A	2	0	0				0	-1.12296	1	0				1
TARS	0	0	0	-0.584247	-1.70284	#N/A	#N/A	#N/A	2	0	0				0	-1.14354	0	1				1
SNRPD2	0	0	0	-0.810117	-1.61319	#N/A	#N/A	#N/A	2	0	0				0	-1.21166	0	1				1
ATP1A1	0.999911	0.866285	0	-2.04998	#N/A	-0.741	#N/A	#N/A	2	0		0			0	-1.39549	1		0			1
SSRP1	0	0	0	-0.848852	-2.06556	#N/A	#N/A	#N/A	2	0	0				0	-1.4572	0	1				1
RPS5	0	0	0	-0.845482	-2.65826	#N/A	#N/A	#N/A	2	0	0				0	-1.75187	0	1				1
IGFBP3	0	0	0	#N/A	#N/A	4.00337	#N/A	#N/A	1			1			1	4.00337			1			1
PENK	0	0	0	#N/A	#N/A	1.68377	#N/A	#N/A	1			1			1	1.68377			1			1
ABHD17A	0	0	0	#N/A	#N/A	#N/A	1.23602	#N/A	1				1		1	1.23602				1		1
PROS1	0	0	0	#N/A	#N/A	-1.00966	#N/A	#N/A	1			0			0	-1.00966			1			1
FIS1	0	0	0	#N/A	#N/A	-1.06165	#N/A	#N/A	1			0			0	-1.06165			1			1
SMOC1	0	0	0	#N/A	#N/A	-1.08402	#N/A	#N/A	1			0			0	-1.08402			1			1
PTPRG	0	0	0	#N/A	#N/A	-1.27364	#N/A	#N/A	1			0			0	-1.27364			1			1
PSMA1	0.999127	0.758921	0	-1.37559	#N/A	#N/A	#N/A	#N/A	1	0					0	-1.37559	1					1
HEL-S-275	0	0	0	-1.37559	#N/A	#N/A	#N/A	#N/A	1	0					0	-1.37559	1					1
SERPING1	0	0	0	#N/A	#N/A	-1.39219	#N/A	#N/A	1			0			0	-1.39219			1			1
RAB1	0	0	0	#N/A	#N/A	-1.41278	#N/A	#N/A	1			0			0	-1.41278			1			1
RNASE4	0	0	0	#N/A	#N/A	-1.41278	#N/A	#N/A	1			0			0	-1.41278			1			1
WISP2	0	0	0	#N/A	#N/A	-1.41512	#N/A	#N/A	1			0			0	-1.41512			1			1
SF3B3	0.99921	0.783935	0	-1.43121	#N/A	#N/A	#N/A	#N/A	1	0					0	-1.43121	1					1
PSMB2	1.00005	0.956061	0	-1.54644	#N/A	#N/A	#N/A	#N/A	1	0					0	-1.54644	1					1
CAPN1	0	0	0	#N/A	-1.59073	#N/A	#N/A	#N/A	1		0				0	-1.59073		1				1
PDGFRB	0	0	0	#N/A	#N/A	-1.66874	#N/A	#N/A	1			0			0	-1.66874			1			1
EIF3G	0	0	0	#N/A	-1.72018	#N/A	#N/A	#N/A	1		0				0	-1.72018		1				1
PLCB3	1.00512	0.358251	0	-1.8154	#N/A	#N/A	#N/A	#N/A	1	0					0	-1.8154	1					1
CCBL2	0.99675	0.4321	0	-1.81807	#N/A	#N/A	#N/A	#N/A	1	0					0	-1.81807	1					1
hCG_23341	0	0	0	-1.81807	#N/A	#N/A	#N/A	#N/A	1	0					0	-1.81807	1					1
CD248	0	0	0	#N/A	#N/A	-1.8458	#N/A	#N/A	1			0			0	-1.8458			1			1
CHI3L2	0	0	0	#N/A	#N/A	-1.86482	#N/A	#N/A	1			0			0	-1.86482			1			1
CRISPLD2	0	0	0	#N/A	-1.86722	#N/A	#N/A	#N/A	1		0				0	-1.86722		1				1
PI15	0	0	0	#N/A	-1.86722	#N/A	#N/A	#N/A	1		0				0	-1.86722		1				1
CA12	0	0	0	#N/A	#N/A	-1.8719	#N/A	#N/A	1			0			0	-1.8719			1			1
RPS26P11	1.01105	0.321327	0	-1.99447	#N/A	#N/A	#N/A	#N/A	1	0					0	-1.99447	1					1
RPS26	1.00002	0.740875	0	-1.99447	#N/A	#N/A	#N/A	#N/A	1	0					0	-1.99447	1					1
DKFZp686G1650	0	0	0	#N/A	-2.14619	#N/A	#N/A	#N/A	1		0				0	-2.14619		1				1
TSNAX	0	0	0	#N/A	-2.14619	#N/A	#N/A	#N/A	1		0				0	-2.14619		1				1
DISC1	0	0	0	#N/A	-2.14619	#N/A	#N/A	#N/A	1		0				0	-2.14619		1				1
SRP14	0	0	0	#N/A	-2.14726	#N/A	#N/A	#N/A	1		0				0	-2.14726		1				1
S100A4	0	0	0	#N/A	#N/A	-2.23389	#N/A	#N/A	1			0			0	-2.23389			1			1
APOD	0	0	0	#N/A	#N/A	-2.3718	#N/A	#N/A	1			0			0	-2.3718			1			1
MFAP4	0	0	0	#N/A	#N/A	-2.69335	#N/A	#N/A	1			0			0	-2.69335			1			1
ACSL4	0.997837	0.518917	0	-3.27777	#N/A	#N/A	#N/A	#N/A	1	0					0	-3.27777	1					1
FACL4	0	0	0	-3.27777	#N/A	#N/A	#N/A	#N/A	1	0					0	-3.27777	1					1
TGFBR3	0	0	0	#N/A	#N/A	-3.39886	#N/A	#N/A	1			0			0	-3.39886			1			1
SOD3	0	0	0	#N/A	#N/A	-3.60163	#N/A	#N/A	1			0			0	-3.60163			1			1
CLEC3B	0	0	0	#N/A	#N/A	-3.71131	#N/A	#N/A	1			0			0	-3.71131			1			1
